# Supplementary material for: Interpretable machine learning-accelerated seed treatment using nanomaterials for environmental stress alleviation
Source: Royal Society of Chemistry journal article supplement (doi:10.1039/d3nr02322b), 2023-01-01
Supplement: d3nr02322b1.xlsx [file d3nr02322b1.xlsx]

## Sheet: Sheet1
No.	Composition	TEM size (nm)	TEM size SD (nm)	Morphology	Concentration (mg/L)	Hydrodynamic diameter (nm)	PdI	Zeta potential (mV)	BET surface area (m2/g)	Root dry weight
1	α-Fe2O3	42.74	10.98	Spherical	200	197	0.3	20.63	137.29	1
2	SiO2	20.93	3.11	Spherical	200	404.53	0.22	-32.77	162.11	1
3	CuO	93.97	25.85	Compound	100	287.27	0.22	17.87	4.07	0
4	SiO2	16.19	2.72	Spherical	100	244.33	0.2	-18.9	200.84	0
5	CeO2	32.51	6.84	Spherical	50	264.87	0.24	44.07	25.31	1
6	SiO2	16.19	2.72	Spherical	50	244.33	0.2	-18.9	200.84	1
7	α-Fe2O3	42.74	10.98	Spherical	25	197	0.3	20.63	137.29	1
8	α-Fe2O3	42.74	10.98	Spherical	50	197	0.3	20.63	137.29	0
9	Fe3O4	12.97	2.92	Spherical	25	867.8	0.73	-8.38	98.41	0
10	CuO	52.94	12.44	Compound	25	376.47	0.33	-12.93	5.31	1
11	ZnO	33.95	10.27	Compound	25	338.43	0.28	-13.13	29.61	0
12	SiO2	16.19	2.72	Spherical	200	244.33	0.2	-18.9	200.84	1
13	TiO2	31.57	7.75	Compound	50	426.83	0.22	25.87	59.74	0
14	CuO	93.97	25.85	Compound	25	287.27	0.22	17.87	4.07	0
15	CeO2	32.51	6.84	Spherical	100	264.87	0.24	44.07	25.31	0
16	γ-Fe2O3	22.51	6.94	Compound	25	350.47	0.22	-10.27	53.96	0
17	CeO2	25.8	5.47	Compound	200	261.83	0.17	26.47	37.45	0
18	α-Fe2O3	42.74	10.98	Spherical	100	197	0.3	20.63	137.29	1
19	Fe3O4	13.17	2.65	Spherical	50	933.73	0.69	-1.51	117.09	0
20	TiO2	31.57	7.75	Compound	100	426.83	0.22	25.87	59.74	0
21	CuO	52.94	12.44	Compound	50	376.47	0.33	-12.93	5.31	1
22	TiO2	17.38	3.94	Compound	200	660	0.54	6.43	87.2	0
23	CeO2	25.8	5.47	Compound	100	261.83	0.17	26.47	37.45	1
24	CuO	52.94	12.44	Compound	200	376.47	0.33	-12.93	5.31	0
25	SiO2	20.93	3.11	Spherical	100	404.53	0.22	-32.77	162.11	0
26	CuO	93.97	25.85	Compound	50	287.27	0.22	17.87	4.07	1
27	ZnO	132.11	32.82	Compound	100	812.77	0.81	4.7	4.71	0
28	CeO2	32.51	6.84	Spherical	25	264.87	0.24	44.07	25.31	0
29	CeO2	25.8	5.47	Compound	50	261.83	0.17	26.47	37.45	1
30	ZnO	132.11	32.82	Compound	50	812.77	0.81	4.7	4.71	1
31	Fe3O4	13.17	2.65	Spherical	100	933.73	0.69	-1.51	117.09	1
32	Fe3O4	13.17	2.65	Spherical	200	933.73	0.69	-1.51	117.09	0
33	TiO2	17.38	3.94	Compound	100	660	0.54	6.43	87.2	1
34	Fe3O4	12.97	2.92	Spherical	50	867.8	0.73	-8.38	98.41	0
35	ZnO	33.95	10.27	Compound	100	338.43	0.28	-13.13	29.61	0
36	γ-Fe2O3	22.51	6.94	Compound	200	350.47	0.22	-10.27	53.96	1
37	γ-Fe2O3	22.51	6.94	Compound	100	350.47	0.22	-10.27	53.96	0
38	SiO2	20.93	3.11	Spherical	25	404.53	0.22	-32.77	162.11	1
39	ZnO	33.95	10.27	Compound	50	338.43	0.28	-13.13	29.61	1
40	CuO	52.94	12.44	Compound	100	376.47	0.33	-12.93	5.31	0
41	TiO2	31.57	7.75	Compound	200	426.83	0.22	25.87	59.74	0
42	ZnO	132.11	32.82	Compound	200	812.77	0.81	4.7	4.71	1
43	Fe3O4	12.97	2.92	Spherical	200	867.8	0.73	-8.38	98.41	0
44	CuO	93.97	25.85	Compound	200	287.27	0.22	17.87	4.07	1
45	Fe3O4	13.17	2.65	Spherical	25	933.73	0.69	-1.51	117.09	0
46	SiO2	20.93	3.11	Spherical	50	404.53	0.22	-32.77	162.11	1
47	TiO2	17.38	3.94	Compound	25	660	0.54	6.43	87.2	0
48	SiO2	16.19	2.72	Spherical	25	244.33	0.2	-18.9	200.84	0
49	ZnO	132.11	32.82	Compound	25	812.77	0.81	4.7	4.71	1
50	CeO2	32.51	6.84	Spherical	200	264.87	0.24	44.07	25.31	1
51	CeO2	25.8	5.47	Compound	25	261.83	0.17	26.47	37.45	1
52	ZnO	33.95	10.27	Compound	200	338.43	0.28	-13.13	29.61	1
53	γ-Fe2O3	22.51	6.94	Compound	50	350.47	0.22	-10.27	53.96	0
54	TiO2	17.38	3.94	Compound	50	660	0.54	6.43	87.2	1
55	TiO2	31.57	7.75	Compound	25	426.83	0.22	25.87	59.74	0
56	Fe3O4	12.97	2.92	Spherical	100	867.8	0.73	-8.38	98.41	1
57	α-Fe2O3	42.74	10.98	Spherical	200	197	0.3	20.63	137.29	1
58	SiO2	20.93	3.11	Spherical	200	404.53	0.22	-32.77	162.11	1
59	CuO	93.97	25.85	Compound	100	287.27	0.22	17.87	4.07	1
60	SiO2	16.19	2.72	Spherical	100	244.33	0.2	-18.9	200.84	0
61	CeO2	32.51	6.84	Spherical	50	264.87	0.24	44.07	25.31	1
62	SiO2	16.19	2.72	Spherical	50	244.33	0.2	-18.9	200.84	1
63	α-Fe2O3	42.74	10.98	Spherical	25	197	0.3	20.63	137.29	1
64	α-Fe2O3	42.74	10.98	Spherical	50	197	0.3	20.63	137.29	0
65	Fe3O4	12.97	2.92	Spherical	25	867.8	0.73	-8.38	98.41	1
66	CuO	52.94	12.44	Compound	25	376.47	0.33	-12.93	5.31	1
67	ZnO	33.95	10.27	Compound	25	338.43	0.28	-13.13	29.61	0
68	SiO2	16.19	2.72	Spherical	200	244.33	0.2	-18.9	200.84	1
69	TiO2	31.57	7.75	Compound	50	426.83	0.22	25.87	59.74	1
70	CuO	93.97	25.85	Compound	25	287.27	0.22	17.87	4.07	1
71	CeO2	32.51	6.84	Spherical	100	264.87	0.24	44.07	25.31	1
72	γ-Fe2O3	22.51	6.94	Compound	25	350.47	0.22	-10.27	53.96	1
73	CeO2	25.8	5.47	Compound	200	261.83	0.17	26.47	37.45	0
74	α-Fe2O3	42.74	10.98	Spherical	100	197	0.3	20.63	137.29	1
75	Fe3O4	13.17	2.65	Spherical	50	933.73	0.69	-1.51	117.09	1
76	TiO2	31.57	7.75	Compound	100	426.83	0.22	25.87	59.74	1
77	CuO	52.94	12.44	Compound	50	376.47	0.33	-12.93	5.31	1
78	TiO2	17.38	3.94	Compound	200	660	0.54	6.43	87.2	1
79	CeO2	25.8	5.47	Compound	100	261.83	0.17	26.47	37.45	1
80	CuO	52.94	12.44	Compound	200	376.47	0.33	-12.93	5.31	1
81	SiO2	20.93	3.11	Spherical	100	404.53	0.22	-32.77	162.11	1
82	CuO	93.97	25.85	Compound	50	287.27	0.22	17.87	4.07	1
83	ZnO	132.11	32.82	Compound	100	812.77	0.81	4.7	4.71	0
84	CeO2	32.51	6.84	Spherical	25	264.87	0.24	44.07	25.31	0
85	CeO2	25.8	5.47	Compound	50	261.83	0.17	26.47	37.45	1
86	ZnO	132.11	32.82	Compound	50	812.77	0.81	4.7	4.71	1
87	Fe3O4	13.17	2.65	Spherical	100	933.73	0.69	-1.51	117.09	1
88	Fe3O4	13.17	2.65	Spherical	200	933.73	0.69	-1.51	117.09	0
89	TiO2	17.38	3.94	Compound	100	660	0.54	6.43	87.2	1
90	Fe3O4	12.97	2.92	Spherical	50	867.8	0.73	-8.38	98.41	1
91	ZnO	33.95	10.27	Compound	100	338.43	0.28	-13.13	29.61	1
92	γ-Fe2O3	22.51	6.94	Compound	200	350.47	0.22	-10.27	53.96	1
93	γ-Fe2O3	22.51	6.94	Compound	100	350.47	0.22	-10.27	53.96	0
94	SiO2	20.93	3.11	Spherical	25	404.53	0.22	-32.77	162.11	1
95	ZnO	33.95	10.27	Compound	50	338.43	0.28	-13.13	29.61	1
96	CuO	52.94	12.44	Compound	100	376.47	0.33	-12.93	5.31	1
97	TiO2	31.57	7.75	Compound	200	426.83	0.22	25.87	59.74	0
98	ZnO	132.11	32.82	Compound	200	812.77	0.81	4.7	4.71	1
99	Fe3O4	12.97	2.92	Spherical	200	867.8	0.73	-8.38	98.41	0
100	CuO	93.97	25.85	Compound	200	287.27	0.22	17.87	4.07	1
101	Fe3O4	13.17	2.65	Spherical	25	933.73	0.69	-1.51	117.09	0
102	SiO2	20.93	3.11	Spherical	50	404.53	0.22	-32.77	162.11	1
103	TiO2	17.38	3.94	Compound	25	660	0.54	6.43	87.2	1
104	SiO2	16.19	2.72	Spherical	25	244.33	0.2	-18.9	200.84	0
105	ZnO	132.11	32.82	Compound	25	812.77	0.81	4.7	4.71	1
106	CeO2	32.51	6.84	Spherical	200	264.87	0.24	44.07	25.31	1
107	CeO2	25.8	5.47	Compound	25	261.83	0.17	26.47	37.45	1
108	ZnO	33.95	10.27	Compound	200	338.43	0.28	-13.13	29.61	1
109	γ-Fe2O3	22.51	6.94	Compound	50	350.47	0.22	-10.27	53.96	0
110	TiO2	17.38	3.94	Compound	50	660	0.54	6.43	87.2	0
111	TiO2	31.57	7.75	Compound	25	426.83	0.22	25.87	59.74	0
112	Fe3O4	12.97	2.92	Spherical	100	867.8	0.73	-8.38	98.41	0
113	α-Fe2O3	42.74	10.98	Spherical	200	197	0.3	20.63	137.29	1
114	SiO2	20.93	3.11	Spherical	200	404.53	0.22	-32.77	162.11	1
115	CuO	93.97	25.85	Compound	100	287.27	0.22	17.87	4.07	0
116	SiO2	16.19	2.72	Spherical	100	244.33	0.2	-18.9	200.84	0
117	CeO2	32.51	6.84	Spherical	50	264.87	0.24	44.07	25.31	0
118	SiO2	16.19	2.72	Spherical	50	244.33	0.2	-18.9	200.84	1
119	α-Fe2O3	42.74	10.98	Spherical	25	197	0.3	20.63	137.29	1
120	α-Fe2O3	42.74	10.98	Spherical	50	197	0.3	20.63	137.29	0
121	Fe3O4	12.97	2.92	Spherical	25	867.8	0.73	-8.38	98.41	0
122	CuO	52.94	12.44	Compound	25	376.47	0.33	-12.93	5.31	1
123	ZnO	33.95	10.27	Compound	25	338.43	0.28	-13.13	29.61	0
124	SiO2	16.19	2.72	Spherical	200	244.33	0.2	-18.9	200.84	0
125	TiO2	31.57	7.75	Compound	50	426.83	0.22	25.87	59.74	0
126	CuO	93.97	25.85	Compound	25	287.27	0.22	17.87	4.07	0
127	CeO2	32.51	6.84	Spherical	100	264.87	0.24	44.07	25.31	0
128	γ-Fe2O3	22.51	6.94	Compound	25	350.47	0.22	-10.27	53.96	0
129	CeO2	25.8	5.47	Compound	200	261.83	0.17	26.47	37.45	0
130	α-Fe2O3	42.74	10.98	Spherical	100	197	0.3	20.63	137.29	0
131	Fe3O4	13.17	2.65	Spherical	50	933.73	0.69	-1.51	117.09	1
132	TiO2	31.57	7.75	Compound	100	426.83	0.22	25.87	59.74	0
133	CuO	52.94	12.44	Compound	50	376.47	0.33	-12.93	5.31	1
134	TiO2	17.38	3.94	Compound	200	660	0.54	6.43	87.2	0
135	CeO2	25.8	5.47	Compound	100	261.83	0.17	26.47	37.45	1
136	CuO	52.94	12.44	Compound	200	376.47	0.33	-12.93	5.31	0
137	SiO2	20.93	3.11	Spherical	100	404.53	0.22	-32.77	162.11	0
138	CuO	93.97	25.85	Compound	50	287.27	0.22	17.87	4.07	0
139	ZnO	132.11	32.82	Compound	100	812.77	0.81	4.7	4.71	1
140	CeO2	32.51	6.84	Spherical	25	264.87	0.24	44.07	25.31	0
141	CeO2	25.8	5.47	Compound	50	261.83	0.17	26.47	37.45	0
142	ZnO	132.11	32.82	Compound	50	812.77	0.81	4.7	4.71	0
143	Fe3O4	13.17	2.65	Spherical	100	933.73	0.69	-1.51	117.09	1
144	Fe3O4	13.17	2.65	Spherical	200	933.73	0.69	-1.51	117.09	0
145	TiO2	17.38	3.94	Compound	100	660	0.54	6.43	87.2	0
146	Fe3O4	12.97	2.92	Spherical	50	867.8	0.73	-8.38	98.41	0
147	ZnO	33.95	10.27	Compound	100	338.43	0.28	-13.13	29.61	0
148	γ-Fe2O3	22.51	6.94	Compound	200	350.47	0.22	-10.27	53.96	0
149	γ-Fe2O3	22.51	6.94	Compound	100	350.47	0.22	-10.27	53.96	0
150	SiO2	20.93	3.11	Spherical	25	404.53	0.22	-32.77	162.11	0
151	ZnO	33.95	10.27	Compound	50	338.43	0.28	-13.13	29.61	0
152	CuO	52.94	12.44	Compound	100	376.47	0.33	-12.93	5.31	0
153	TiO2	31.57	7.75	Compound	200	426.83	0.22	25.87	59.74	0
154	ZnO	132.11	32.82	Compound	200	812.77	0.81	4.7	4.71	0
155	Fe3O4	12.97	2.92	Spherical	200	867.8	0.73	-8.38	98.41	0
156	CuO	93.97	25.85	Compound	200	287.27	0.22	17.87	4.07	1
157	Fe3O4	13.17	2.65	Spherical	25	933.73	0.69	-1.51	117.09	0
158	SiO2	20.93	3.11	Spherical	50	404.53	0.22	-32.77	162.11	1
159	TiO2	17.38	3.94	Compound	25	660	0.54	6.43	87.2	0
160	SiO2	16.19	2.72	Spherical	25	244.33	0.2	-18.9	200.84	0
161	ZnO	132.11	32.82	Compound	25	812.77	0.81	4.7	4.71	0
162	CeO2	32.51	6.84	Spherical	200	264.87	0.24	44.07	25.31	1
163	CeO2	25.8	5.47	Compound	25	261.83	0.17	26.47	37.45	1
164	ZnO	33.95	10.27	Compound	200	338.43	0.28	-13.13	29.61	1
165	γ-Fe2O3	22.51	6.94	Compound	50	350.47	0.22	-10.27	53.96	0
166	TiO2	17.38	3.94	Compound	50	660	0.54	6.43	87.2	0
167	TiO2	31.57	7.75	Compound	25	426.83	0.22	25.87	59.74	0
168	Fe3O4	12.97	2.92	Spherical	100	867.8	0.73	-8.38	98.41	0
169	α-Fe2O3	42.74	10.98	Spherical	200	197	0.3	20.63	137.29	1
170	SiO2	20.93	3.11	Spherical	200	404.53	0.22	-32.77	162.11	1
171	CuO	93.97	25.85	Compound	100	287.27	0.22	17.87	4.07	0
172	SiO2	16.19	2.72	Spherical	100	244.33	0.2	-18.9	200.84	0
173	CeO2	32.51	6.84	Spherical	50	264.87	0.24	44.07	25.31	1
174	SiO2	16.19	2.72	Spherical	50	244.33	0.2	-18.9	200.84	1
175	α-Fe2O3	42.74	10.98	Spherical	25	197	0.3	20.63	137.29	1
176	α-Fe2O3	42.74	10.98	Spherical	50	197	0.3	20.63	137.29	0
177	Fe3O4	12.97	2.92	Spherical	25	867.8	0.73	-8.38	98.41	1
178	CuO	52.94	12.44	Compound	25	376.47	0.33	-12.93	5.31	1
179	ZnO	33.95	10.27	Compound	25	338.43	0.28	-13.13	29.61	0
180	SiO2	16.19	2.72	Spherical	200	244.33	0.2	-18.9	200.84	1
181	TiO2	31.57	7.75	Compound	50	426.83	0.22	25.87	59.74	1
182	CuO	93.97	25.85	Compound	25	287.27	0.22	17.87	4.07	0
183	CeO2	32.51	6.84	Spherical	100	264.87	0.24	44.07	25.31	0
184	γ-Fe2O3	22.51	6.94	Compound	25	350.47	0.22	-10.27	53.96	0
185	CeO2	25.8	5.47	Compound	200	261.83	0.17	26.47	37.45	0
186	α-Fe2O3	42.74	10.98	Spherical	100	197	0.3	20.63	137.29	1
187	Fe3O4	13.17	2.65	Spherical	50	933.73	0.69	-1.51	117.09	1
188	TiO2	31.57	7.75	Compound	100	426.83	0.22	25.87	59.74	1
189	CuO	52.94	12.44	Compound	50	376.47	0.33	-12.93	5.31	1
190	TiO2	17.38	3.94	Compound	200	660	0.54	6.43	87.2	0
191	CeO2	25.8	5.47	Compound	100	261.83	0.17	26.47	37.45	1
192	CuO	52.94	12.44	Compound	200	376.47	0.33	-12.93	5.31	0
193	SiO2	20.93	3.11	Spherical	100	404.53	0.22	-32.77	162.11	1
194	CuO	93.97	25.85	Compound	50	287.27	0.22	17.87	4.07	0
195	ZnO	132.11	32.82	Compound	100	812.77	0.81	4.7	4.71	1
196	CeO2	32.51	6.84	Spherical	25	264.87	0.24	44.07	25.31	0
197	CeO2	25.8	5.47	Compound	50	261.83	0.17	26.47	37.45	1
198	ZnO	132.11	32.82	Compound	50	812.77	0.81	4.7	4.71	1
199	Fe3O4	13.17	2.65	Spherical	100	933.73	0.69	-1.51	117.09	1
200	Fe3O4	13.17	2.65	Spherical	200	933.73	0.69	-1.51	117.09	0
201	TiO2	17.38	3.94	Compound	100	660	0.54	6.43	87.2	0
202	Fe3O4	12.97	2.92	Spherical	50	867.8	0.73	-8.38	98.41	0
203	ZnO	33.95	10.27	Compound	100	338.43	0.28	-13.13	29.61	0
204	γ-Fe2O3	22.51	6.94	Compound	200	350.47	0.22	-10.27	53.96	1
205	γ-Fe2O3	22.51	6.94	Compound	100	350.47	0.22	-10.27	53.96	0
206	SiO2	20.93	3.11	Spherical	25	404.53	0.22	-32.77	162.11	1
207	ZnO	33.95	10.27	Compound	50	338.43	0.28	-13.13	29.61	1
208	CuO	52.94	12.44	Compound	100	376.47	0.33	-12.93	5.31	0
209	TiO2	31.57	7.75	Compound	200	426.83	0.22	25.87	59.74	0
210	ZnO	132.11	32.82	Compound	200	812.77	0.81	4.7	4.71	1
211	Fe3O4	12.97	2.92	Spherical	200	867.8	0.73	-8.38	98.41	0
212	CuO	93.97	25.85	Compound	200	287.27	0.22	17.87	4.07	1
213	Fe3O4	13.17	2.65	Spherical	25	933.73	0.69	-1.51	117.09	0
214	SiO2	20.93	3.11	Spherical	50	404.53	0.22	-32.77	162.11	1
215	TiO2	17.38	3.94	Compound	25	660	0.54	6.43	87.2	0
216	SiO2	16.19	2.72	Spherical	25	244.33	0.2	-18.9	200.84	0
217	ZnO	132.11	32.82	Compound	25	812.77	0.81	4.7	4.71	1
218	CeO2	32.51	6.84	Spherical	200	264.87	0.24	44.07	25.31	1
219	CeO2	25.8	5.47	Compound	25	261.83	0.17	26.47	37.45	1
220	ZnO	33.95	10.27	Compound	200	338.43	0.28	-13.13	29.61	1
221	γ-Fe2O3	22.51	6.94	Compound	50	350.47	0.22	-10.27	53.96	0
222	TiO2	17.38	3.94	Compound	50	660	0.54	6.43	87.2	0
223	TiO2	31.57	7.75	Compound	25	426.83	0.22	25.87	59.74	0
224	Fe3O4	12.97	2.92	Spherical	100	867.8	0.73	-8.38	98.41	1
