# Supplementary material for: Interpretable machine learning-accelerated seed treatment using nanomaterials for environmental stress alleviation
Source: Royal Society of Chemistry journal article supplement (doi:10.1039/d3nr02322b), 2023-01-01
Supplement: d3nr02322b2.xlsx [file d3nr02322b2.xlsx]

## Sheet: pos
ID	adduct	Name	VIP	Fold change	p-value	m/z	rt(min)	KEGG	Superclass	Class	Subclass	Formula	INCHIKEY	SMILES	SC1	SC2	SC3	SC4	SC5	SC6	SN1	SN2	SN3	SN4	SN5	SN6
POS_10629	[M+H]+	beta-Maltose	1.0501	1.80122	2.06468e-05	343.122	0.668		Organic oxygen compounds	Organooxygen compounds	Carbohydrates and carbohydrate conjugates	C12H22O11	GUBGYTABKSRVRQ-QUYVBRFLSA-N	OCC1OC(OC2C(O)C(O)C(O)OC2CO)C(O)C(O)C1O	60782.5	54772.6	53755.6	57480.8	49491.6	52222.7	82680.5	118619	103783	102412	82948.3	101268
POS_6110	[M+H]+	Glucosamine 6-phosphate	2.09989	2.01326	0.000122485	260.055	5.795	C00352	Organic oxygen compounds	Organooxygen compounds	Carbohydrates and carbohydrate conjugates	C6H14NO8P	XHMJOUIAFHJHBW-UKFBFLRUSA-N	NC1C(O)OC(CO[P](O)(O)=O)C(O)C1O	123390	216732	210601	214024	149268	185533	388759	435702	395561	390054	354801	248803
POS_11789	[M+NH4]+	beta-Gentiobiose	1.89066	1.69462	0.000166581	360.147	0.663		Organic oxygen compounds	Organooxygen compounds	Carbohydrates and carbohydrate conjugates	C12H22O11	DLRVVLDZNNYCBX-CQUJWQHSSA-N	OCC1OC(OCC2OC(O)C(O)C(O)C2O)C(O)C(O)C1O	220245	225775	177059	218305	182664	235247	290952	383115	411844	374534	278839	394738
POS_6058	[M+H]+	Alternariol	2.94701	2.17851	0.000375174	259.072	5.589	C16838	Phenylpropanoids and polyketides	Coumarins and derivatives		C14H10O5	CEBXXEKPIIDJHL-UHFFFAOYSA-N	CC1=CC(=CC2=C1C3=CC(=CC(=C3C(=O)O2)O)O)O	277670	288339	296028	372298	291850	384585	658442	917829	538994	870216	671608	505553
POS_14165	[M+H]+	Myrislignan	1.14853	1.85552	0.000497465	397.16	1.654					C21H26O6	ULZFTGWWPHYLGI-RBZFPXEDSA-N	C[C@@H]([C@@H](C1=CC(=C(C=C1)O)OC)O)OC2=C(C=C(C=C2OC)CC=C)OC	66187.2	64041.7	74937.8	64456.1	63239.6	66283.2	95182.6	148073	123416	157209	89467.5	127274
POS_18823	[M+H]+	Cirsimarin	1.07554	0.514928	0.00175074	477.132	5.475		Phenylpropanoids and polyketides	Flavonoids	Flavonoid glycosides	C23H24O11	RETJLKUBHXTIGH-FZFRBNDOSA-N	COC1=CC2=C(C(=C1OC)O)C(=O)C=C(O2)C3=CC=C(OC4OC(CO)C(O)C(O)C4O)C=C3	116941	125628	124532	77496.1	132134	81596	55101.8	35934.4	77296.8	34611.5	55846.2	80200.5
POS_4002	[M+H]+	Kainic Acid	1.01967	1.78345	0.00203447	214.107	1.52		Organic acids and derivatives	Carboxylic acids and derivatives	Amino acids, peptides, and analogues	C10H15NO4	VLSMHEGGTFMBBZ-OOZYFLPDSA-N	CC(=C)C1CNC(C1CC(O)=O)C(O)=O	49908.3	57586.5	67147.9	45517.1	71867.5	49095.9	85181.6	87905.6	140385	86886	84951.5	123066
POS_25879	[M+H]+	Diosmin	2.22599	0.619051	0.00209294	609.409	11.166		Phenylpropanoids and polyketides	Flavonoids	Flavonoid glycosides	C28H32O15	GZSOSUNBTXMUFQ-YFAPSIMESA-N	COC1=C(O)C=C(C=C1)C2=CC(=O)C3=C(O)C=C(OC4OC(COC5OC(C)C(O)C(O)C5O)C(O)C(O)C4O)C=C3O2	749899	550963	414123	657980	695463	493902	322974	329308	362002	364141	412541	414297
POS_6932	[M+H]+	Shogaol	2.32744	1.21924	0.00219518	277.179	8.261	C10494	Benzenoids	Phenols	Methoxyphenols	C17H24O3	OQWKEEOHDMUXEO-BQYQJAHWSA-N	CCCCCC=CC(=O)CCC1=CC=C(O)C(=C1)OC	1.04231e+06	978969	1.13117e+06	904114	1.08063e+06	944648	1.19992e+06	1.24317e+06	1.27314e+06	1.08569e+06	1.21618e+06	1.39715e+06
POS_6112	[M+Na]+	3-Hydroxycarbofuran	1.59172	1.78772	0.00285128	260.087	3.796		Organoheterocyclic compounds	Coumarans		C12H15NO4	RHSUJRQZTQNSLL-UHFFFAOYSA-N	CNC(=O)OC1=CC=CC2=C1OC(C)(C)C2O	118815	99391	109991	211001	122539	199267	229240	313960	218073	327756	208513	241688
POS_784	[M-H2O+H]+	Anthranilic acid	1.06185	1.41521	0.00419756	120.043	3.464	C00108	Benzenoids	Benzene and substituted derivatives	Benzoic acids and derivatives	C7H7NO2	RWZYAGGXGHYGMB-UHFFFAOYSA-N	NC1=CC=CC=C1C(O)=O	95257.7	105859	110058	154217	100320	151320	149232	191725	162269	192501	147261	171759
POS_1250	[M-H2O+H]+	3-Hydroxyanthranilic acid	1.36603	1.51284	0.00421622	136.038	4.228	C00632	Benzenoids	Benzene and substituted derivatives	Benzoic acids and derivatives	C7H7NO3	WJXSWCUQABXPFS-UHFFFAOYSA-N	NC1=C(C=CC=C1O)C(O)=O	139516	164597	206199	139453	227498	139669	209960	235958	218261	323247	270892	280136
POS_2700	[M+H]+	4-Acetylbenzo[d]oxazol-2(3H)-one	2.05383	1.46955	0.00450703	178.049	3.591		Organoheterocyclic compounds	Benzoxazoles	Benzoxazolones	C9H7NO3	FZAQRVWPQCXSPC-UHFFFAOYSA-N	CC(=O)C1=C2NC(=O)OC2=CC=C1	327725	371038	381866	520265	386287	490152	521487	557450	713090	539627	538962	769958
POS_6844	[M+H]+	Nandrolone	1.60699	0.620837	0.00501484	275.2	11.166	C07254	Lipids and lipid-like molecules	Steroids and steroid derivatives	Estrane steroids	C18H26O2	NPAGDVCDWIYMMC-IZPLOLCNSA-N	CC12CCC3C(CCC4=CC(=O)CCC34)C1CCC2O	425168	328301	217802	403318	344784	249910	160614	205676	212059	200456	224880	218921
POS_10034	[M+H]+	Strychnidin-10-one	1.03226	1.26934	0.0052193	335.181	7.507		Alkaloids and derivatives	Strychnos alkaloids		C21H22N2O2	QMGVPVSNSZLJIA-UHFFFAOYSA-N	O=C1CC2OCC=C3CN4CCC56C4CC3C2C5N1C7=C6C=CC=C7	173614	202670	192775	152355	165978	151072	212965	206921	232968	186617	220940	257754
POS_1376	[M+H]+	Gentisyl alcohol	1.04117	1.38024	0.00965894	141.053	2.794		Benzenoids	Phenols	Benzenediols	C7H8O3	PUZSUVGRVHEUQO-UHFFFAOYSA-N	OCC1=C(O)C=CC(=C1)O	109954	124396	100955	168983	97995.1	172013	160803	193885	188030	194508	153540	177950
POS_1742	[M+H]+	2-Hydroxy-4-methoxybenzaldehyde	1.76756	1.5984	0.0106379	153.053	3.726					C8H8O3	WZUODJNEIXSNEU-UHFFFAOYSA-N	COC1=CC(=C(C=C1)C=O)O	220785	209292	267525	305653	260854	262266	291440	547145	392850	542992	300851	364473
POS_2856	[M+H]+	Etilefrine	1.86627	11.5598	0.0124565	182.117	2.698		Benzenoids	Phenols	1-hydroxy-4-unsubstituted benzenoids	C10H15NO2	SQVIAVUSQAWMKL-UHFFFAOYSA-N	CCNCC(O)C1=CC(=CC=C1)O	8778.14	11361.9	10302	28651.5	11723	32142.6	210422	32484.4	360107	27246.5	210641	349290
POS_10732	[M+H]+	Bullatine A	1.69898	0.743331	0.0138247	344.257	6.513					C22H33NO2	OVXLNQAYPUEDSI-LVIQKLEBSA-N	CCN1C[C@@]2(CCCC34[C@@H]2CC(C31)C56[C@@H]4[C@H](C(CC5)C(=C)[C@H]6O)O)C	599640	666840	684794	466113	758293	512206	399805	436822	541970	411380	407181	544164
POS_5255	[M+H]+	N-(2,3-dihydroxybenzoyl)-L-serine	4.15743	1.89839	0.0173481	242.065	3.696					C10H11NO6	VDTYHTVHFIIEIL-MDOHGIEYNA-N	O=C(O)C(NC(=O)C=1C=CC=C(O)C1O)CO	929442	903138	850251	1.16394e+06	895849	1.08011e+06	1.41619e+06	2.78345e+06	1.3462e+06	2.79918e+06	1.48294e+06	1.22582e+06
POS_27202	[M+H]+	Thalsimine	1.20705	0.76325	0.0176692	637.304	10.616		Phenylpropanoids and polyketides	Tannins		C38H40N2O7	YWNUNVSMOKMJMG-LJAQVGFWSA-N	COC1=C2OC3=CC=C(CC4=NCCC5=CC(=C(OC6=C(OC)C(=C(OC)C7=C6[C@H](CC(=C2)C=C1)N(C)CC7)OC)C=C45)OC)C=C3	392172	334673	228618	375565	334439	324669	271664	261882	207604	271347	297417	209055
POS_3639	[M+H]+	Tryptophan	1.06862	1.45157	0.0190954	205.096	2.362	C00078	Organoheterocyclic compounds	Indoles and derivatives	Indolyl carboxylic acids and derivatives	C11H12N2O2	QIVBCDIJIAJPQS-VIFPVBQESA-N	NC(CC1=C[NH]C2=C1C=CC=C2)C(O)=O	103653	122785	122477	173157	132095	200257	244219	169287	178931	192731	275520	179569
POS_605	[M+H]+	2-Acetylpyrrole	3.36411	1.28328	0.0195286	110.058	2.283					C6H7NO	IGJQUJNPMOYEJY-UHFFFAOYSA-N	O=C(C1=CC=CN1)C	1.47097e+06	1.56738e+06	1.62064e+06	2.2836e+06	1.6428e+06	2.47995e+06	2.14724e+06	2.5465e+06	2.39778e+06	2.59435e+06	2.26591e+06	2.2481e+06
POS_1317	[M+H]+	Trigonelline HCl	4.45103	0.648919	0.0249419	138.055	0.695					C7H7NO2.HCl	TZSYLWAXZMNUJB-UHFFFAOYSA-N	C[N+]1=CC=CC(=C1)C(=O)O.[Cl-]	3.74408e+06	3.71228e+06	2.22897e+06	3.25575e+06	2.32811e+06	3.36383e+06	1.95253e+06	2.77014e+06	1.14922e+06	2.98807e+06	2.00829e+06	1.22308e+06
POS_7796	[M+H]+	14-(Hydroxymethyl)-5,9-dimethyltetracyclo[11.2.1.0~1,10~.0~4,9~]hexadecan-5-ol	1.28939	1.56711	0.0268297	293.246	10.203		Lipids and lipid-like molecules	Prenol lipids	Diterpenoids	C19H32O2	LZAZGDZVFQSCFO-UHFFFAOYSA-N	CC1(O)CCCC2(C)C1CCC34CC(CO)C(CCC23)C4	84899.8	179761	89811.8	196124	79083.8	224667	209014	262685	178685	281274	196884	210316
POS_25480	[M+H]+	Nostoxanthin	1.64775	0.572634	0.0325322	601.421	10.78	C16284	Lipids and lipid-like molecules	Prenol lipids	Tetraterpenoids	C40H56O4	JVPASJUYZJKFHY-HWFHZMFDSA-N	CC(=C/C=C/C=C(C)/C=C/C=C(C)/C=C/C1=C(C)C[C@@H](O)[C@H](O)C1(C)C)\\C=C\\C=C(C)\\C=C\\C2=C(C)C[C@@H](O)[C@H](O)C2(C)C	385171	657249	169227	484352	285266	488361	229944	211373	201761	278195	255451	237469
POS_1780	[M+H]+	3-Amino-5-hydroxybenzoic acid	2.14962	1.1327	0.0349026	154.048	3.918		Benzenoids	Benzene and substituted derivatives	Benzoic acids and derivatives	C7H7NO3	QPEJHSFTZVMSJH-UHFFFAOYSA-N	NC1=CC(=CC(=C1)O)C(O)=O	1.82068e+06	1.6239e+06	1.81195e+06	2.062e+06	2.05746e+06	1.75827e+06	2.23379e+06	2.21087e+06	2.11648e+06	1.99056e+06	2.25799e+06	1.80206e+06
POS_3542	[M+Na]+	Fructose (Generic Ketohexose)	1.81472	1.42292	0.0351572	203.05	0.673		Organic oxygen compounds	Organooxygen compounds	Carbohydrates and carbohydrate conjugates	C6H12O6	LKDRXBCSQODPBY-UHFFFAOYSA-N	OCC1(O)OCC(O)C(O)C1O	229091	225833	551728	449796	541873	481259	462697	653862	593872	662973	482713	672123
POS_3213	[M+H]+	Senkyunolide A	1.66117	0.452738	0.0369846	193.119	4.672					C12H16O2	ZPIKVDODKLJKIN-NSHDSACASA-N	CCCC[C@H]1C2=C(C=CCC2)C(=O)O1	161528	390264	410194	170405	454506	114063	151915	66990.2	210486	112083	110673	117942
POS_2775	[M+H]+	D-Glucosamine	1.14301	1.34639	0.0400788	180.085	0.653	C00329	Organic oxygen compounds	Organooxygen compounds	Carbohydrates and carbohydrate conjugates	C6H13NO5	MSWZFWKMSRAUBD-IVMDWMLBSA-N	N[C@H]1C(O)O[C@H](CO)[C@@H](O)[C@@H]1O	224419	205269	198369	192448	197604	218618	237276	385455	219187	356000	233181	234018
POS_3547	[M+H]+	Diphenylphosphinyl radical	1.51016	1.51366	0.0450561	203.061	0.614		Benzenoids	Benzene and substituted derivatives	Phenylphosphines and derivatives	C12H11OP	ASUOLLHGALPRFK-UHFFFAOYSA-N	O=[PH](C1=CC=CC=C1)C2=CC=CC=C2	97777.9	107126	335649	248318	325869	294549	301815	438203	417013	389467	250726	335956
POS_15286	[M+Na]+	(1S,2R,4aR,8aR)-1-Acetoxy-7-isopropylidene-1,4a-dimethyl-6-oxodecahydro-2-naphthalenyl 2,3-dimethyl-2-oxiranecarboxylate	1.03875	1.68218	0.0481963	415.206	8.615		Lipids and lipid-like molecules	Prenol lipids	Sesquiterpenoids	C22H32O6	APZBLWQCTHVAMR-XRZTVBGOSA-N	CC1OC1(C)C(=O)O[C@@H]2CC[C@]3(C)CC(=O)C(C[C@H]3[C@]2(C)OC(C)=O)=C(C)C	98243.5	67842.6	138793	90414	140540	73070.9	123083	137406	121509	272151	126260	243877
POS_12179	[M+Na]+	(2S)-7-Hydroxy-3-oxo-3,4-dihydro-2H-1,4-benzoxazin-2-yl beta-D-glucopyranoside	1.0916	2.3212	0.0485198	366.077	2.332		Organic oxygen compounds	Organooxygen compounds	Carbohydrates and carbohydrate conjugates	C14H17NO9	VUFDXOACUHDTLI-PUOUXSMHSA-N	OC[C@H]1O[C@@H](O[C@@H]2OC3=CC(=CC=C3NC2=O)O)[C@H](O)[C@@H](O)[C@@H]1O	43393.7	43802.1	27488.4	71204.5	31114.5	76273.6	94324.4	183645	45554	203306	109272	44652.9

## Sheet: neg
ID	adduct	Name	VIP	Fold change	p-value	m/z	rt(min)	KEGG	Superclass	Class	Subclass	Formula	INCHIKEY	SMILES	SC1	SC2	SC3	SC4	SC5	SC6	SN1	SN2	SN3	SN4	SN5	SN6
NEG_7602	[M-H]-	Lactose	1.74739	3.04115	2.15453e-07	387.109	0.668					C12H22O11	GUBGYTABKSRVRQ-PICCSMPSSA-N	C([C@@H]1[C@H]([C@@H]([C@H]([C@H](O1)O[C@@H]2[C@H](OC([C@@H]([C@H]2O)O)O)CO)O)O)O)O	196248	173489	164223	167725	171319	189222	473179	488267	625694	493417	521949	627878
NEG_6127	[M-H]-	Trehalose	1.9284	2.75591	2.44159e-07	341.106	0.668	C01083	Organic oxygen compounds	Organooxygen compounds	Carbohydrates and carbohydrate conjugates	C12H22O11	HDTRYLNUVZCQOY-LIZSDCNHSA-N	OCC1OC(OC2OC(CO)C(O)C(O)C2O)C(O)C(O)C1O	282670	241297	235356	227503	255894	261197	603666	644766	787722	632134	668228	808141
NEG_1046	[M-H]-	Coixol	5.43838	1.43574	0.000481408	164.033	3.912		Organoheterocyclic compounds	Benzoxazoles	Benzoxazolones	C8H7NO3	MKMCJLMBVKHUMS-UHFFFAOYSA-N	COC1=CC=C2NC(=O)OC2=C1	7.20555e+06	7.7492e+06	9.50872e+06	8.56265e+06	8.21064e+06	9.2431e+06	1.04156e+07	1.46893e+07	1.25554e+07	1.18229e+07	1.07052e+07	1.22875e+07
NEG_4472	[M-H]-	14-(3-Ethyloxiran-2-YL)tetradeca-9,12-dienoic acid	2.59056	1.4954	0.00158374	293.212	9.808		Lipids and lipid-like molecules	Fatty Acyls	Fatty acids and conjugates	C18H30O3	HKSDVVJONLXYKL-UHFFFAOYSA-N	CCC1OC1CC=CCC=CCCCCCCCC(O)=O	1.89297e+06	2.24062e+06	1.61838e+06	1.61483e+06	1.47157e+06	1.80346e+06	2.36339e+06	2.57491e+06	3.20009e+06	2.23285e+06	2.39025e+06	3.15227e+06
NEG_6520	[M-H]-	Chlorogenic acid	1.08132	4.10911	0.00255653	353.088	2.215	C00852	Organic oxygen compounds	Organooxygen compounds	Alcohols and polyols	C16H18O9	CWVRJTMFETXNAD-JUHZACGLSA-N	OC1CC(O)(CC(OC(=O)C=CC2=CC=C(O)C(=C2)O)C1O)C(O)=O	26441	28536.8	102930	21344.4	83109.7	20364.1	97630.8	290601	212240	257005	91129.3	213144
NEG_17160	[M-H]-	PE 36:4	3.4198	1.55277	0.00733722	738.508	12.321					C41H74NO8P	SSCDRSKJTAQNNB-MAZCIEHSSA-N		3.06136e+06	3.6049e+06	3.11946e+06	2.84252e+06	3.40805e+06	2.92221e+06	6.29806e+06	5.41979e+06	3.51567e+06	5.81169e+06	5.13298e+06	3.26002e+06
NEG_18165	[M-H]-	Purpureaside C	1.02275	0.53764	0.00800799	785.261	6.222					C35H46O20	FSBUXLDOLNLABB-HSCIEKESSA-N	C[C@H]1[C@@H]([C@H]([C@H]([C@@H](O1)O[C@@H]2[C@H]([C@@H](O[C@@H]([C@H]2OC(=O)/C=C/C3=CC(=C(C=C3)O)O)CO[C@H]4[C@@H]([C@H]([C@H]([C@H](O4)CO)O)O)O)OCCC5=CC(=C(C=C5)O)O)O)O)O)O	475307	458953	352051	249131	364228	255496	252099	108814	199498	105875	299644	192773
NEG_612	[M-H]-	3,4-Dihydroxybenzaldehyde	2.09713	1.236	0.00849897	137.026	2.709	C16700	Organic oxygen compounds	Organooxygen compounds	Carbonyl compounds	C7H6O3	IBGBGRVKPALMCQ-UHFFFAOYSA-N	OC1=CC=C(C=O)C=C1O	1.96858e+06	2.21457e+06	2.28269e+06	2.80333e+06	2.05651e+06	2.94708e+06	3.10638e+06	2.9824e+06	2.91762e+06	2.76013e+06	3.01778e+06	2.85683e+06
NEG_5222	[M-H]-	Isorhamnetin	1.36766	1.54174	0.0103366	315.046	6.139	C10084	Phenylpropanoids and polyketides	Flavonoids	Flavones	C16H12O7	IZQSVPBOUDKVDZ-UHFFFAOYSA-N	COC1=C(O)C=CC(=C1)C2=C(O)C(=O)C3=C(O2)C=C(O)C=C3O	236961	399120	614941	347693	623950	351621	565257	613955	767688	573994	691244	756753
NEG_6519	[M-H]-	3-[3-(3,4-Dihydroxyphenyl)prop-2-enoyloxy]-1,4,5-trihydroxycyclohexane-1-carboxylic acid	1.19476	2.30555	0.0155832	353.087	1.914		Organic oxygen compounds	Organooxygen compounds	Alcohols and polyols	C16H18O9	CWVRJTMFETXNAD-UHFFFAOYSA-N	OC1CC(O)(CC(OC(=O)C=CC2=CC(=C(O)C=C2)O)C1O)C(O)=O	79091.9	87515.8	319112	32381.3	273547	52172.8	210864	360920	399989	349219	205081	419397
NEG_4198	[M-H]-	Fisetin	9.42671	1.48841	0.0187522	285.039	6.093	C10041	Phenylpropanoids and polyketides	Flavonoids	Flavones	C15H10O6	XHEFDIBZLJXQHF-UHFFFAOYSA-N	OC1=CC2=C(C=C1)C(=O)C(=C(O2)C3=CC(=C(O)C=C3)O)O	1.89803e+07	2.09763e+07	3.31797e+07	1.5479e+07	3.07392e+07	1.59016e+07	2.87775e+07	2.79172e+07	4.1042e+07	2.98329e+07	3.31717e+07	4.05748e+07
NEG_19063	[M-H]-	PI 34:2	1.61162	0.728054	0.0347205	833.509	12.935					C43H79O13P	BSNJSZUDOMPYIR-BCTRXSSUSA-N	CCCCC/C=C\C/C=C\CCCCCCCC(=O)OC(COC(=O)CCCCCCCCCCCCCCC)COP(=O)(O)OC1C(C(C(C(C1O)O)O)O)O	1.24516e+06	1.13559e+06	1.0433e+06	1.45523e+06	1.00184e+06	1.67716e+06	1.228e+06	990731	743807	928455	1.02028e+06	591553
NEG_2376	[M-H]-	13-Oxotrideca-9,11-dienoic acid	4.44873	0.867348	0.0370678	223.134	7.015		Lipids and lipid-like molecules	Fatty Acyls	Fatty acids and conjugates	C13H20O3	XHDHWGKEDVWKAN-UHFFFAOYSA-N	OC(=O)CCCCCCCC=CC=CC=O	2.45777e+07	2.30482e+07	3.00242e+07	2.20345e+07	2.62745e+07	2.19728e+07	23187403	2.00102e+07	2.17543e+07	2.09894e+07	2.02043e+07	2.2163e+07
