# Supplementary material for: Interpretable machine learning-accelerated seed treatment using nanomaterials for environmental stress alleviation
Source: Royal Society of Chemistry journal article supplement (doi:10.1039/d3nr02322b), 2023-01-01
Supplement: d3nr02322b3.xlsx [file d3nr02322b3.xlsx]

## Sheet: pos
ID	adduct	Name	VIP	Fold change	p-value	m/z	rt(min)	KEGG	Superclass	Class	Subclass	Formula	INCHIKEY	SMILES	HdC1	HdC2	HdC3	HdC4	HdC5	HdC6	HdN1	HdN2	HdN3	HdN4	HdN5	HdN6
POS_9137	[M+H]+	Steviol	2.96139	1.67495	1.17019e-06	319.222	9.521		Lipids and lipid-like molecules	Prenol lipids	Diterpenoids	C20H30O3	QFVOYBUQQBFCRH-VQSWZGCSSA-N	C[C@@]12CCC[C@](C)([C@H]1CC[C@]34CC(=C)[C@](O)(CC[C@@H]23)C4)C(O)=O	1.36131e+06	1.51102e+06	1.60504e+06	1.35346e+06	1.41158e+06	1.58247e+06	2.82916e+06	2.29863e+06	2.51706e+06	2.44323e+06	2.45541e+06	2.23771e+06
POS_10524	[M+H]+	Poldine	1.04728	1.8253	3.84213e-05	341.203	9.52		Benzenoids	Benzene and substituted derivatives	Diphenylmethanes	[C21H26NO3]+	CQRKVVAGMJJJSR-UHFFFAOYSA-N	C[N+]1(C)CCCC1COC(=O)C(O)(C2=CC=CC=C2)C3=CC=CC=C3	110560	160643	179866	107728	149390	179994	311034	255577	288692	265490	271901	228508
POS_7754	[M+H]+	N(4)-Acetylsulfadiazine	2.07428	1.39546	4.11526e-05	293.063	0.665		Benzenoids	Benzene and substituted derivatives	Benzenesulfonamides	C12H12N4O3S	NJIZUWGMNCUKGU-UHFFFAOYSA-N	CC(=O)NC1=CC=C(C=C1)[S](=O)(=O)NC2=NC=CC=N2	1.66425e+06	1.60539e+06	1.4093e+06	1.6829e+06	1.55768e+06	1.55485e+06	2.32744e+06	1.90472e+06	2.4737e+06	2.08247e+06	2.17522e+06	2.25757e+06
POS_9025	[M+K]+	Meranzin hydrate	1.28326	0.178787	7.4855e-05	317.083	1.482		Phenylpropanoids and polyketides	Coumarins and derivatives		C15H18O5	KGGUASRIGLRPAX-UHFFFAOYSA-N	COC1=C(CC(O)C(C)(C)O)C2=C(C=CC(=O)O2)C=C1	229214	139013	127786	220101	140856	112437	37065.6	16151.1	30414.6	26168.2	32761.9	30756.1
POS_1376	[M+H]+	Gentisyl alcohol	1.81097	2.41478	8.75642e-05	141.053	2.794		Benzenoids	Phenols	Benzenediols	C7H8O3	PUZSUVGRVHEUQO-UHFFFAOYSA-N	OCC1=C(O)C=CC(=C1)O	302886	207305	192357	293190	196982	188124	640532	511596	518007	479911	745068	439313
POS_6946	[M+H-H2O]+	3-(2,5-Octadienyl)-oxiraneoctanoic acid	2.30679	1.58001	0.000232991	277.215	10.177		Lipids and lipid-like molecules	Fatty Acyls	Fatty acids and conjugates	C18H30O3	JTEGNNHWOIJBJZ-UHFFFAOYSA-N	CCC=CCC=CCC1OC1CCCCCCCC(O)=O	1.14523e+06	888042	1.02378e+06	880225	965805	1.25421e+06	1.66945e+06	1.67538e+06	1.22678e+06	1.68969e+06	1.87491e+06	1.59235e+06
POS_17626	[M+K]+	[3-Hydroxy-1-(4-methoxy-7-oxofuro[3,2-g]chromen-9-yl)oxy-3-methylbutan-2-yl] (E)-2-methylbut-2-enoate	1.98377	1.27966	0.000535416	455.113	0.641		Phenylpropanoids and polyketides	Coumarins and derivatives	Furanocoumarins	C22H24O8	QUSMURJIBTWAOP-WUXMJOGZSA-N	COC1=C2C=COC2=C(OCC(OC(=O)C(C)=CC)C(C)(C)O)C3=C1C=CC(=O)O3	2.62557e+06	2.43739e+06	2.25652e+06	2.58823e+06	2.42788e+06	2.69245e+06	3.48624e+06	2.71109e+06	3.50899e+06	3.00967e+06	3.26829e+06	3.2465e+06
POS_605	[M+H]+	2-Acetylpyrrole	1.93071	1.24935	0.00126114	110.058	2.283					C6H7NO	IGJQUJNPMOYEJY-UHFFFAOYSA-N	O=C(C1=CC=CN1)C	3.05693e+06	2.92966e+06	3.49586e+06	3.29176e+06	2.72405e+06	2.96036e+06	3.73238e+06	3.52414e+06	4389497	3.96083e+06	3.55148e+06	3.90298e+06
POS_4931	[M+H]+	Pterosin G	1.42411	1.41549	0.0014626	235.131	6.779		Benzenoids	Indanes	Indanones	C14H18O3	LGXRGPOUGZXSEB-NSHDSACASA-N	CC1=CC2=C(C(=C1CCO)C)C(=O)[C@H](CO)C2	870048	913210	682948	1.01941e+06	912616	706157	1.37337e+06	1.15601e+06	1.08375e+06	1.18878e+06	1.39526e+06	1.02802e+06
POS_2856	[M+H]+	Etilefrine	1.44712	0.0261542	0.00238084	182.117	2.698		Benzenoids	Phenols	1-hydroxy-4-unsubstituted benzenoids	C10H15NO2	SQVIAVUSQAWMKL-UHFFFAOYSA-N	CCNCC(O)C1=CC(=CC=C1)O	229406	338662	58545.3	237913	291748	54465.1	8456.31	2627.31	4402.78	2804.25	9497.91	3877.37
POS_26036	[M+H]+	Glutathione (oxidized form)	1.17448	1.38917	0.00457686	613.15	5.707		Organic acids and derivatives	Carboxylic acids and derivatives	Amino acids, peptides, and analogues	C20H32N6O12S2	YPZRWBKMTBYPTK-UHFFFAOYSA-N	NC(CCC(=O)NC(CSSCC(NC(=O)CCC(N)C(O)=O)C(=O)NCC(O)=O)C(=O)NCC(O)=O)C(O)=O	678844	651753	500276	687579	650819	549875	1.0409e+06	730538	812932	685252	998596	898317
POS_5255	[M+H]+	N-(2,3-dihydroxybenzoyl)-L-serine	3.7453	0.682924	0.00686314	242.065	3.696					C10H11NO6	VDTYHTVHFIIEIL-MDOHGIEYNA-N	O=C(O)C(NC(=O)C=1C=CC=C(O)C1O)CO	4.11319e+06	2.99696e+06	4.31011e+06	4.15658e+06	2.60713e+06	3.35644e+06	2.06868e+06	2.06382e+06	3.08368e+06	2.62631e+06	2.14636e+06	2.72163e+06
POS_745	[M+H]+	Valine	1.0924	0.553838	0.00706503	118.085	0.728	C00183	Organic acids and derivatives	Carboxylic acids and derivatives	Amino acids, peptides, and analogues	C5H11NO2	KZSNJWFQEVHDMF-BYPYZUCNSA-N	CC(C)C(N)C(O)=O	167011	180838	311928	194153	180696	277559	104564	91710.6	186316	95325.4	105770	143051
POS_21361	[M+NH4]+	Melezitose	1.76328	1.44674	0.0090084	522.203	0.669	C08243	Organic oxygen compounds	Organooxygen compounds	Carbohydrates and carbohydrate conjugates	C18H32O16	QWIZNVHXZXRPDR-WSCXOGSTSA-N	OCC1OC(OC2C(O)C(CO)OC2(CO)OC3OC(CO)C(O)C(O)C3O)C(O)C(O)C1O	1.25338e+06	1.03192e+06	1.07414e+06	1.35593e+06	854205	918157	1.7471e+06	1.12266e+06	1.96228e+06	1.27234e+06	1.61722e+06	1.66447e+06
POS_16362	[M+H]+	Isovitexin	1.39315	1.53116	0.00969333	433.108	4.513		Phenylpropanoids and polyketides	Flavonoids	Flavonoid glycosides	C21H20O10	MYXNWGACZJSMBT-VJXVFPJBSA-N	OC[C@H]1O[C@H]([C@H](O)[C@@H](O)[C@@H]1O)C2=C(O)C3=C(OC(=CC3=O)C4=CC=C(O)C=C4)C=C2O	572594	488043	553312	497187	521419	508282	1.02098e+06	486887	785919	725841	1.05641e+06	733100
POS_6110	[M+H]+	Glucosamine 6-phosphate	2.57152	1.83724	0.00995652	260.055	5.795	C00352	Organic oxygen compounds	Organooxygen compounds	Carbohydrates and carbohydrate conjugates	C6H14NO8P	XHMJOUIAFHJHBW-UKFBFLRUSA-N	NC1C(O)OC(CO[P](O)(O)=O)C(O)C1O	667560	914377	1.12515e+06	738366	1.04631e+06	1.22277e+06	1.22062e+06	2.48644e+06	1.43002e+06	2.46844e+06	1.32244e+06	1.57106e+06
POS_10629	[M+H]+	beta-Maltose	1.39179	1.45367	0.0101687	343.122	0.668		Organic oxygen compounds	Organooxygen compounds	Carbohydrates and carbohydrate conjugates	C12H22O11	GUBGYTABKSRVRQ-QUYVBRFLSA-N	OCC1OC(OC2C(O)C(O)C(O)OC2CO)C(O)C(O)C1O	692370	668784	708434	798558	546480	648045	1.27017e+06	696566	1.06599e+06	750986	1.13933e+06	982742
POS_800	[M+H]+	Phenylacetaldehyde	1.197	0.622239	0.0120759	121.063	7.158	C00601	Benzenoids	Benzene and substituted derivatives	Phenylacetaldehydes	C8H8O	DTUQWGWMVIHBKE-UHFFFAOYSA-N	O=CCC1=CC=CC=C1	447429	249609	259451	443234	336225	268406	181576	277038	170915	208550	169739	239370
POS_2775	[M+H]+	D-Glucosamine	1.07356	1.2383	0.0121609	180.085	0.653	C00329	Organic oxygen compounds	Organooxygen compounds	Carbohydrates and carbohydrate conjugates	C6H13NO5	MSWZFWKMSRAUBD-IVMDWMLBSA-N	N[C@H]1C(O)O[C@H](CO)[C@@H](O)[C@@H]1O	775482	880807	1.09413e+06	800819	851758	1.13968e+06	1.06308e+06	1.17092e+06	1.18205e+06	1.25442e+06	1.02358e+06	1.16945e+06
POS_7888	[M+H]+	9-Oxooctadeca-10,12-dienoic acid	5.79284	1.55708	0.0122795	295.225	8.626		Lipids and lipid-like molecules	Fatty Acyls	Lineolic acids and derivatives	C18H30O3	LUZSWWYKKLTDHU-UHFFFAOYSA-N	CCCCCC=CC=CC(=O)CCCCCCCC(O)=O	9.85777e+06	7.92865e+06	8.94194e+06	1.04867e+07	6.86092e+06	9.72476e+06	1.30145e+07	9.72658e+06	1.96935e+07	1.02482e+07	1.62004e+07	1.48888e+07
POS_8856	[M+H]+	Dihydroxyoctadecadienoic acid	1.17298	1.29551	0.014084	313.235	8.333		Lipids and lipid-like molecules	Fatty Acyls	Lineolic acids and derivatives	C18H32O4	YJNRBSIIJBOEIF-FZIQOSRTSA-N	CCCCCCCCCCCCCC=CC(O)=C(O)C(O)=O	848120	837792	1.27158e+06	989511	866984	1.14375e+06	1.2058e+06	1.30455e+06	1.48963e+06	1.11346e+06	1.13921e+06	1.46565e+06
POS_2807	[M+H]+	Jasmolone	1.19469	1.58637	0.014709	181.12	6.125					C11H16O2	SVRKACAGHUZSGU-SNAWJCMRNA-N	O=C1C(=C(C)C(O)C1)CC=CCC	450747	308075	294202	431840	293666	272102	673132	356886	577889	368118	697410	579633
POS_4241	[M+H]+	Pantothenic acid	1.09314	0.735402	0.01698	220.117	2.021	C00864	Organic acids and derivatives	Carboxylic acids and derivatives	Amino acids, peptides, and analogues	C9H17NO5	GHOKWGTUZJEAQD-ZETCQYMHSA-N	CC(C)(CO)C(O)C(O)=NCCC(O)=O	492924	284688	418235	388022	297189	481430	299834	279180	281035	291869	284146	301314
POS_6934	[M+H]+	1,8-dimethyl-6-oxo-7-(propan-2-ylidene)-2,3,4,8-tetrahydro-1H-naphthalen-2-ylacetate	1.03407	0.791826	0.017466	277.183	8.565					C17H24O3	RIMSRWLZAHVEPH-FHXDREJJNA-N	O=C1C=C2CCC(OC(=O)C)C(C)C2(C)CC1=C(C)C	428001	309034	324174	375617	367122	348838	268574	330692	249666	235492	357445	262762
POS_5555	[M+H]+	Meperidine	1.00185	0.61987	0.0231067	248.163	5.05	C07128	Organoheterocyclic compounds	Piperidines	Phenylpiperidines	C15H21NO2	XADCESSVHJOZHK-UHFFFAOYSA-N	CCOC(=O)C1(CCN(C)CC1)C2=CC=CC=C2	304232	157416	207012	301791	168200	183483	155016	82551.1	179672	100179	134226	167908
POS_7796	[M+H]+	14-(Hydroxymethyl)-5,9-dimethyltetracyclo[11.2.1.0~1,10~.0~4,9~]hexadecan-5-ol	2.22495	2.0655	0.0262405	293.246	10.203		Lipids and lipid-like molecules	Prenol lipids	Diterpenoids	C19H32O2	LZAZGDZVFQSCFO-UHFFFAOYSA-N	CC1(O)CCCC2(C)C1CCC34CC(CO)C(CCC23)C4	757004	394279	447501	575327	405088	563185	763371	1.67886e+06	620045	1.77438e+06	817973	835962
POS_21381	[M+H]+	(2-Hydroxy-3-octadec-9-enoyloxypropyl) 2-(trimethylazaniumyl)ethyl phosphate	1.46882	1.8803	0.0275931	522.357	10.732		Lipids and lipid-like molecules	Glycerophospholipids	Glycerophosphocholines	C26H52NO7P	YAMUFBLWGFFICM-UHFFFAOYSA-N	CCCCCCCCC=CCCCCCCCC(=O)OCC(O)CO[P]([O-])(=O)OCC[N+](C)(C)C	220293	541171	290759	167386	712568	448236	843201	512555	616992	452456	1.09703e+06	953660
POS_5945	[M+H]+	Palmitic amide	1.23597	1.44434	0.0290569	256.263	10.962					C16H33NO	HSEMFIZWXHQJAE-UHFFFAOYSA-N	O=C(N)CCCCCCCCCCCCCCC	741894	505375	479823	609302	662505	573965	630953	769504	801004	656924	1.17496e+06	1.12709e+06
POS_2918	[M+H]+	Phosphorylcholine	1.09241	0.557625	0.02912	184.071	0.692		Organic nitrogen compounds	Organonitrogen compounds	Quaternary ammonium salts	C5H15NO4P+	YHHSONZFOIEMCP-UHFFFAOYSA-N	C[N+](C)(C)CCO[P](O)([O-])=O	283621	214890	288946	238022	186551	521418	192172	152320	155268	173355	173142	120357
POS_6021	[M]+	2-(((R)-2,3-Dihydroxypropyl)phosphoryloxy)-N,N,N-trimethylethanaminium	2.01898	0.628292	0.0305618	258.11	0.595		Lipids and lipid-like molecules	Glycerophospholipids	Glycerophosphocholines	[C8H21NO6P]+	SUHOQUVVVLNYQR-MRVPVSSYSA-O	C[N+](C)(C)CCO[P](O)(=O)OCC(O)CO	1.19086e+06	695473	1.14525e+06	1.08744e+06	978814	1.03837e+06	257491	768400	699965	593760	363770	1.17195e+06
POS_23694	[M+H]+	Normetanephrine	1.2272	1.2272	0.0306115	565.15	4.06		Phenylpropanoids and polyketides	Flavonoids	Flavonoid glycosides	C26H28O14	MMDUKUSNQNWVET-VYUBKLCTSA-N	OCC1OC(C(O)C(O)C1O)C2=C(O)C3=C(OC(=CC3=O)C4=CC=C(O)C=C4)C(=C2O)C5OCC(O)C(O)C5O	1.54159e+06	1.57387e+06	2.14096e+06	1.86074e+06	1.3817e+06	2.09866e+06	2.49231e+06	1.87422e+06	2.27028e+06	1.9348e+06	2.27624e+06	2.15741e+06
POS_19706	[M+Na]+	Withaferin A	3.2987	1.73993	0.034299	493.253	4.015		Lipids and lipid-like molecules	Steroids and steroid derivatives	Steroid lactones	C28H38O6	DBRXOUCRJQVYJQ-CKNDUULBSA-N	C[C@H]([C@H]1CC(=C(CO)C(=O)O1)C)[C@H]2CC[C@H]3[C@@H]4C[C@H]5O[C@]56[C@@H](O)C=CC(=O)[C@]6(C)[C@H]4CC[C@]23C	1.69394e+06	4.28421e+06	2.2943e+06	2.06562e+06	1.41194e+06	1.93857e+06	5.28387e+06	5.08454e+06	4.93898e+06	3.73002e+06	2.30192e+06	2.47782e+06
POS_232	[M+H]+	Piperidine	1.08033	0.712354	0.0350775	86.0957	1.099	C01746	Organoheterocyclic compounds	Piperidines		C5H11N	NQRYJNQNLNOLGT-UHFFFAOYSA-N	C1CCNCC1	282951	292299	409279	292280	270164	416235	239389	158540	334452	173909	209017	283191
POS_11789	[M+NH4]+	beta-Gentiobiose	1.95399	1.55923	0.0361251	360.147	0.663		Organic oxygen compounds	Organooxygen compounds	Carbohydrates and carbohydrate conjugates	C12H22O11	DLRVVLDZNNYCBX-CQUJWQHSSA-N	OCC1OC(OCC2OC(O)C(O)C(O)C2O)C(O)C(O)C1O	1.02224e+06	1.19355e+06	1.42081e+06	1.16882e+06	1.01005e+06	1.27403e+06	2.77061e+06	1.24297e+06	1.66762e+06	1.40153e+06	2.54735e+06	1.42412e+06
POS_3213	[M+H]+	Senkyunolide A	1.49828	2.03328	0.0374337	193.119	4.672					C12H16O2	ZPIKVDODKLJKIN-NSHDSACASA-N	CCCC[C@H]1C2=C(C=CCC2)C(=O)O1	128333	329025	446341	251682	235352	407189	982243	308941	958539	365719	476248	563993
POS_2700	[M+H]+	4-Acetylbenzo[d]oxazol-2(3H)-one	1.01719	1.18898	0.0402506	178.049	3.591		Organoheterocyclic compounds	Benzoxazoles	Benzoxazolones	C9H7NO3	FZAQRVWPQCXSPC-UHFFFAOYSA-N	CC(=O)C1=C2NC(=O)OC2=CC=C1	1.55813e+06	1.4552e+06	1.60608e+06	1.59908e+06	1.38058e+06	1.58691e+06	1.93948e+06	1.43438e+06	2.11155e+06	1.48382e+06	1.96726e+06	1.9855e+06
POS_11172	[M+H]+	Vinpocetine	1.82246	1.75714	0.0428477	351.213	7.153		Alkaloids and derivatives	Eburnan-type alkaloids		C22H26N2O2	DDNCQMVWWZOMLN-UHFFFAOYSA-N	CCOC(=O)C1=CC2(CC)CCCN3CCC4=C(C23)[N]1C5=CC=CC=C45	192283	597329	1.29367e+06	202296	616268	930898	1.50124e+06	896865	1.42888e+06	895504	880017	1.13217e+06
POS_8963	[M+H]+	Kahweol	1.00754	1.23409	0.045509	315.193	9.048		Organoheterocyclic compounds	Naphthofurans		C20H26O3	JEKMKNDURXDJAD-HWUKTEKMSA-N	C[C@@]12C=CC3=C(C=CO3)[C@H]1CC[C@@]45C[C@@H](CC[C@@H]24)[C@@](O)(CO)C5	1.19492e+06	1.28636e+06	1.20368e+06	1.22952e+06	1.33667e+06	1.12216e+06	1.73662e+06	1.14813e+06	1.6671e+06	1.13264e+06	1.80965e+06	1.60518e+06
POS_7351	[M+H]+	Diazepam	1.4244	0.455339	0.0470282	285.086	7.283	C06948	Organoheterocyclic compounds	Benzodiazepines	1,4-benzodiazepines	C16H13ClN2O	AAOVKJBEBIDNHE-UHFFFAOYSA-N	CN1C(=O)CN=C(C2=CC=CC=C2)C3=C1C=CC(=C3)Cl	182431	394581	589792	179018	329367	521817	40165.9	137508	338206	132533	34650.8	317319
POS_24390	[M+H]+	Vitexin-2-rhamnoside	2.2446	1.50006	0.0495695	579.167	4.523					C27H30O14	LYGPBZVKGHHTIE-UHFFFAOYSA-N	CC1C(C(C(C(O1)OC2C(C(C(CO)OC2C3=C4C(=C(C=C3O)O)C(=O)C=C(C5=CC=C(C=C5)O)O4)O)O)O)O)O	2.11147e+06	1.5505e+06	1.85023e+06	2.03398e+06	1.50446e+06	1.401e+06	3.5629e+06	1.57142e+06	2.99807e+06	1.54009e+06	3.51796e+06	2.48762e+06
POS_6195	[M+NH4]+	4-Oxododecanedioic acid	1.0542	1.54933	0.0497215	262.165	5.115		Organic acids and derivatives	Keto acids and derivatives	Medium-chain keto acids and derivatives	C12H20O5	HHXMOTDTSDYYEI-UHFFFAOYSA-N	OC(=O)CCCCCCCC(=O)CCC(O)=O	438731	262579	416806	441764	409952	186971	741833	284273	658763	356844	668067	631819

## Sheet: neg
ID	adduct	Name	VIP	Fold change	p-value	m/z	rt(min)	KEGG	Superclass	Class	Subclass	Formula	INCHIKEY	SMILES	HdC1	HdC2	HdC3	HdC4	HdC5	HdC6	HdN1	HdN2	HdN3	HdN4	HdN5	HdN6
NEG_5766	[M-H]-	9,12,13-Trihydroxyoctadec-10-enoic acid	1.47293	3.18164	0.000120312	329.231	7.503		Lipids and lipid-like molecules	Fatty Acyls	Fatty acids and conjugates	C18H34O5	MDIUMSLCYIJBQC-UHFFFAOYSA-N	CCCCCC(O)C(O)C=CC(O)CCCCCCCC(O)=O	94714.1	249937	322622	64896.4	182425	252088	615697	431226	724417	660788	485328	794515
NEG_9523	[M-H]-	Kaempferol-3-O-glucoside	2.14914	2.00396	0.000256634	447.09	5.016					C21H20O11	JPUKWEQWGBDDQB-UHFFFAOYNA-N	O=C1C(OC2OC(CO)C(O)C(O)C2O)=C(OC=3C=C(O)C=C(O)C13)C=4C=CC(O)=CC4	1.14003e+06	680347	620327	1.1664e+06	808986	575787	1.71234e+06	1.85228e+06	1.35465e+06	1.92579e+06	1.83553e+06	1.32297e+06
NEG_10038	[M-H]-	Hyperoside	1.27239	1.75546	0.000480606	463.084	4.612	C10073	Phenylpropanoids and polyketides	Flavonoids	Flavonoid glycosides	C21H20O12	OVSQVDMCBVZWGM-DTGCRPNFSA-N	OCC1OC(OC2=C(OC3=C(C(=CC(=C3)O)O)C2=O)C4=CC(=C(O)C=C4)O)C(O)C(O)C1O	521912	381993	342537	658388	371513	327428	776847	804060	902185	756012	648986	682729
NEG_5568	[M-H]-	FA 18:3;3O	2.35133	2.14271	0.00120803	325.2	7.784		Lipids and lipid-like molecules	Fatty Acyls	Fatty acids and conjugates	C18H30O5	PAHHZUIGGXPZTO-UHFFFAOYSA-N	O=C(O)CCCCCC=CC(O)C=CC(O)C(O)CC=CCC	1.05873e+06	805736	882478	1.2536e+06	726302	749966	2.32006e+06	1.26419e+06	2.68481e+06	1.43589e+06	1.95687e+06	2.0734e+06
NEG_16801	[M-H]-	Dipalmitoylphosphatidylglycerol	1.54016	1.45937	0.00212481	721.5	13.31		Lipids and lipid-like molecules	Glycerophospholipids	Glycerophosphoglycerols	C38H75O10P	BIABMEZBCHDPBV-UHFFFAOYSA-N	CCCCCCCCCCCCCCCC(=O)OCC(CO[P](O)(=O)OCC(O)CO)OC(=O)CCCCCCCCCCCCCCC	1.57385e+06	1.0223e+06	925580	1.54994e+06	971236	1.12174e+06	1.92932e+06	1.59969e+06	1.58863e+06	1.65124e+06	1.85808e+06	1.82892e+06
NEG_9525	[M-H]-	Orientin	1.34898	0.879362	0.00272463	447.093	4.088		Phenylpropanoids and polyketides	Flavonoids	Flavonoid glycosides	C21H20O11	PLAPMLGJVGLZOV-VPRICQMDSA-N	OC[C@H]1O[C@H]([C@H](O)[C@@H](O)[C@@H]1O)C2=C3OC(=CC(=O)C3=C(O)C=C2O)C4=CC(=C(O)C=C4)O	1.42273e+06	1.5028e+06	1.69631e+06	1.57017e+06	1.50482e+06	1.53001e+06	1.38913e+06	1.31927e+06	1.39677e+06	1.23517e+06	1.34289e+06	1.4305e+06
NEG_3679	[M-H]-	Heptadecanoic acid	1.15394	1.40261	0.00455969	269.248	11.672		Lipids and lipid-like molecules	Fatty Acyls	Fatty acids and conjugates	C17H34O2	KEMQGTRYUADPNZ-UHFFFAOYSA-N	CCCCCCCCCCCCCCCCC(O)=O	879980	812591	821410	864019	794433	873447	1.28284e+06	916151	1.53648e+06	969735	1.15454e+06	1.21765e+06
NEG_3250	[M-H]-	9-Hexadecenoic acid	3.83473	1.5223	0.00496917	253.217	11.115		Lipids and lipid-like molecules	Fatty Acyls	Fatty acids and conjugates	C16H30O2	SECPZKHBENQXJG-BQYQJAHWSA-N	CCCCCC\\C=C\\CCCCCCCC(O)=O	6.08643e+06	7.86535e+06	8.70598e+06	6.86003e+06	7.81405e+06	8.44717e+06	1.28263e+07	8.82597e+06	1.42562e+07	8.14968e+06	1.20865e+07	1.35448e+07
NEG_11236	[M-H]-	Raffinose	1.9122	1.79684	0.00511453	503.158	0.667	C00492	Organic oxygen compounds	Organooxygen compounds	Carbohydrates and carbohydrate conjugates	C18H32O16	MUPFEKGTMRGPLJ-ZQSKZDJDSA-N	OCC1OC(OCC2OC(OC3(CO)OC(CO)C(O)C3O)C(O)C(O)C2O)C(O)C(O)C1O	939395	1.05931e+06	1.1837e+06	911233	998813	858559	2.41519e+06	1.23313e+06	1.75209e+06	1.41444e+06	2.4471e+06	1.43107e+06
NEG_4063	[M-H]-	trans-Vaccenic acid	5.42285	1.37956	0.00645385	281.248	11.498	C08367	Lipids and lipid-like molecules	Fatty Acyls	Fatty acids and conjugates	C18H34O2	UWHZIFQPPBDJPM-BQYQJAHWSA-N	CCCCCC\\C=C\\CCCCCCCCCC(O)=O	2.53321e+07	2.29955e+07	2.72751e+07	1.95863e+07	1.68482e+07	1.88106e+07	2.64282e+07	2.89849e+07	3.68655e+07	3.0745e+07	2.50007e+07	3.24884e+07
NEG_852	[M-H]-	Histidine	1.54953	0.607324	0.0116742	154.061	0.614	C00135	Organic acids and derivatives	Carboxylic acids and derivatives	Amino acids, peptides, and analogues	C6H9N3O2	HNDVDQJCIGZPNO-YFKPBYRVSA-N	NC(CC1=CN=C[NH]1)C(O)=O	702943	970898	1.26704e+06	693066	1.14136e+06	812523	422433	659139	510678	741594	334715	725063
NEG_18165	[M-H]-	Purpureaside C	1.14253	4.03844	0.01712	785.261	6.222					C35H46O20	FSBUXLDOLNLABB-HSCIEKESSA-N	C[C@H]1[C@@H]([C@H]([C@H]([C@@H](O1)O[C@@H]2[C@H]([C@@H](O[C@@H]([C@H]2OC(=O)/C=C/C3=CC(=C(C=C3)O)O)CO[C@H]4[C@@H]([C@H]([C@H]([C@H](O4)CO)O)O)O)OCCC5=CC(=C(C=C5)O)O)O)O)O)O	148083	66465.9	48110.3	160040	57536.5	36812.7	657581	144702	288429	176648	583841	236869
NEG_453	[M-H]-	2-Ammonioethanesulfonate	1.44409	1.16009	0.0212716	124.017	2.964		Organic acids and derivatives	Organic sulfonic acids and derivatives	Organosulfonic acids and derivatives	C2H7NO3S	XOAAWQZATWQOTB-UHFFFAOYSA-N	NCC[S](O)(=O)=O	7.15579e+06	6.3042e+06	6.97656e+06	7.81003e+06	5.67089e+06	7.32852e+06	7.89983e+06	7.80764e+06	8.73529e+06	8.48778e+06	6.9439e+06	7.97452e+06
NEG_4831	[M-H]-	9,16-Dioxooctadec-10,12,14-trienoic acid	1.15128	1.71766	0.0251098	305.171	7.28		Lipids and lipid-like molecules	Fatty Acyls	Lineolic acids and derivatives	C18H26O4	PQPRTPXWQQQKJC-UHFFFAOYSA-N	CCC(=O)C=CC=CC=CC(=O)CCCCCCCC(O)=O	538092	313686	394166	519364	330449	376038	842480	404913	758530	381903	1.02098e+06	836891
NEG_14083	[M-H]-	5-Hydroxy-2-(3-hydroxy-4-methoxyphenyl)-7-[(2S,3R,4S,5S,6R)-3,4,5-trihydroxy-6-[[(2R,3R,4R,5R,6S)-3,4,5-trihydroxy-6-methyloxan-2-yl]oxymethyl]oxan-2-yl]oxy-2,3-dihydrochromen-4-one	1.07232	0.521932	0.0278152	609.177	4.589		Phenylpropanoids and polyketides	Flavonoids	Flavonoid glycosides	C28H34O15	QUQPHWDTPGMPEX-LLHRBZKSSA-N	COC1=CC=C(C=C1O)C2CC(=O)C3=C(O)C=C(OC4OC(COC5OC(C)C(O)C(O)C5O)C(O)C(O)C4O)C=C3O2	349194	406655	132028	543156	382483	536429	111716	197140	331725	185411	99354.9	301164
NEG_4144	[M-H]-	Methyl heptadecanoate	2.777	1.21015	0.0349777	283.263	11.915		Lipids and lipid-like molecules	Fatty Acyls	Fatty acid esters	C18H36O2	HUEBIMLTDXKIPR-UHFFFAOYSA-N	CCCCCCCCCCCCCCCCC(=O)OC	1.98384e+07	1.52831e+07	1.73607e+07	1.868e+07	1.45638e+07	1.66873e+07	2.21373e+07	1.65554e+07	2.15132e+07	1.76614e+07	2.14581e+07	2.46099e+07
NEG_515	[M-H]-	Asparagine	1.0213	0.174519	0.0353772	131.045	0.626	C00152	Organic acids and derivatives	Carboxylic acids and derivatives	Amino acids, peptides, and analogues	C4H8N2O3	DCXYFEDJOCDNAF-REOHCLBHSA-N	NC(CC(O)=N)C(O)=O	74696	135221	547419	73339.2	175589	346465	26777.6	30460.9	51425.2	35084.7	30320.2	62008.6
NEG_5977	[M-H]-	3-p-Coumaroylquinic acid	2.19668	2.05403	0.0392642	337.093	2.322	C12208	Organic oxygen compounds	Organooxygen compounds	Alcohols and polyols	C16H18O8	BMRSEYFENKXDIS-QHAYPTCMSA-N	OC1CC(O)(CC(OC(=O)C=CC2=CC=C(O)C=C2)C1O)C(O)=O	1.29323e+06	1.15602e+06	1.44847e+06	1.51636e+06	975772	1.25809e+06	2.4656e+06	1.29516e+06	4.87671e+06	1.41825e+06	2.10376e+06	3.54963e+06
NEG_11556	[M+Cl]-	Methyl (3R,4R,5R)-5-[(2R,3R,4S,5S,6R)-4,5-dihydroxy-6-(hydroxymethyl)-3-[(E)-3-phenylprop-2-enoyl]oxyoxan-2-yl]oxy-3,4-dihydroxycyclohexene-1-carboxylate	1.33438	0.884097	0.0459907	515.118	3.387		Lipids and lipid-like molecules	Fatty Acyls	Fatty acyl glycosides	C23H28O11	DWQNDLRNUNNJHX-NZNOAPCVSA-N	COC(=O)C1=CC(O)C(O)C(C1)OC2OC(CO)C(O)C(O)C2OC(=O)C=CC3=CC=CC=C3	1.67612e+06	1.82778e+06	2.05593e+06	1.89602e+06	1.68842e+06	1.73713e+06	1.41426e+06	1.80584e+06	1.67128e+06	1.77686e+06	1.42346e+06	1.52851e+06
NEG_12870	[M-H]-	Corymboside	1.09083	1.38811	0.0474736	563.142	4.539		Phenylpropanoids and polyketides	Flavonoids	Flavonoid glycosides	C26H28O14	OVMFOVNOXASTPA-UHFFFAOYSA-N	OCC1OC(C(O)C(O)C1O)C2=C(O)C(=C(O)C3=C2OC(=CC3=O)C4=CC=C(O)C=C4)C5OCC(O)C(O)C5O	1.19118e+06	710622	768046	1.53811e+06	989120	864431	1.15949e+06	1.18791e+06	1.46908e+06	1.13171e+06	1.6298e+06	1.83605e+06
