# Supplementary material for: Interpretable machine learning-accelerated seed treatment using nanomaterials for environmental stress alleviation
Source: Royal Society of Chemistry journal article supplement (doi:10.1039/d3nr02322b), 2023-01-01
Supplement: d3nr02322b4.pdf [file d3nr02322b4.pdf]

## Supplementary Information for

### Interpretable machine learning-accelerated seed treatment by nanomaterials for environmental stress alleviation

Hengjie Yu<sup>a,b</sup>, Dan Luo<sup>c</sup>, Sam Fong Yau Li<sup>d</sup>, Maozhen Qu<sup>a,b</sup>, Da Liu<sup>a,b</sup>, Yingchao He<sup>a,b</sup>,  
and Fang Cheng<sup>\*a,b</sup>.

<sup>a</sup>College of Biosystems Engineering and Food Science, Zhejiang University, Hangzhou  
310058, China

<sup>b</sup>Key Laboratory of Intelligent Equipment and Robotics for Agriculture of Zhejiang  
Province, Hangzhou 310058, China

<sup>c</sup>Department of Biological and Environmental Engineering, Cornell University, Ithaca,  
New York 14853, USA

<sup>d</sup>Department of Chemistry, National University of Singapore, 3 Science Drive 3,  
Singapore 117543, Singapore

\* Corresponding author, [fcheng@zju.edu.cn](mailto:fcheng@zju.edu.cn) (Fang Cheng)

This supplementary information file includes:

- Methods S1 to S5
- Figures S1 to S21
- Tables S1 to S6

## Methods

### Method S1. Determination of root:shoot ratio

The root:shoot ratio was calculated as the following equation:

$$\text{Root:shoot ratio} = \frac{\text{root dry weight}}{\text{stem dry weight} + \text{leaf dry weight}} \times 100\%$$

**Method S2.** Determination of SRI

The SRI was calculated as the following equation:

$$SRI = \sum_{i=1}^{10} \frac{k_i}{k_i^c}$$

where  $k_i$  is the value of the  $i^{\text{th}}$  endpoint for each treatment, and  $k_i^c$  is the value of the  $i^{\text{th}}$  endpoint for the control. SRI comprehensively considers the relative value of nano-primed and control treatment in ten biological endpoints, and thus the SRI for control is 10.0.

**Method S3.** Analytical method, instrument parameters, and data acquisition of metabolomics analysis

The samples were separated by Agilent 1290 infinity LC ultra performance liquid chromatography (UHPLC) on a C-18 column (column temperature:40 °C). The flow rate of gradient elution was set at 0.4 ml/min, and the injection volume was 2  $\mu$ L. The mobile phase A = 25 mM ammonium acetate and 0.5% formic acid in water and mobile phase B = methanol. The gradient elution procedure was as follows: 5% B in the first 0.5 min, linearly increased to 100% in the next 9.5 min, and maintained at 100% for 2 min; then it was linearly decreased to 5% in 6 s and maintained at 5% in the next 3.9 min. The sample was placed in an automatic sampler at 4 °C during the whole analysis.

Parameter settings of ESI source: Ion Source Gas1 (Gas1) at 60, Ion Source Gas2 (Gas2) at 60, curtain gas at 30, ion source temperature at 600 °C, ion spray voltage floating at  $\pm$  5500 V. The instrument was set to collect data in the m/z range of 60-1000 Da in MS only acquisition, and the accumulation time for TOF MS scan was 0.20 s/spectra. The instrument acquired data over the m/z range 25-1000 Da in auto MS/MS acquisition, and the accumulation time for product ion scan was 0.05 s/spectra. Production scans were acquired using information dependent acquisition with high sensitivity mode selected. The parameters were set as follows: the collision energy at 35 V with  $\pm$  15 eV; declustering potential at  $\pm$  60 V (positive and negative modes); exclude isotopes within 4 Da and candidate ions to monitor per cycle at 10.

**Method S4.** Line fitting of SHAP main effects and SHAP interactions

The line fitting was based on python language using “scipy.optimize” and “numpy.polyfit” packages. The fitting equations are described as follows:

(1) Piecewise linear fitting for SHAP main effects of the TEM size of nanoparticles (Fig. 4e):

$$y = \begin{cases} 2.00 \times 10^{-1} x - 3.87, & x \leq 21.50 \text{ nm} \\ 1.50 \times 10^{-3} x + 3.90 \times 10^{-1}, & x > 21.50 \text{ nm} \end{cases}$$

where  $x$  is the TEM size of nanoparticles, and  $y$  is the SHAP main effect value.

(2) Linear fitting for SHAP main effects of the zeta potential of nanoparticles (Fig. 4f):

$$y = -1.14 \times 10^{-2} x - 2.77 \times 10^{-2} x$$

where  $x$  is the zeta potential of nanoparticles, and  $y$  is the SHAP main effect value.

(3) Logistic fitting for SHAP interactions between the zeta potential and concentration of nanoparticles (Fig. 4k):

$$y = \begin{cases} \frac{-2.28}{1 + e^{4.66 + 5.48 \times 10^{-1} x_1}} + 8.39 \times 10^{-1}, & x_2 = 100 \text{ mg/L} \\ \frac{2.29}{1 + e^{10.57 + 9.32 \times 10^{-1} x_1}} - 6.91 \times 10^{-1}, & x_2 = 50 \text{ mg/L} \end{cases}$$

where  $x_1$  is the zeta potential of nanoparticles,  $x_2$  is the concentration of nanoparticles, and  $y$  is the SHAP interaction value.

(4) Plateau fitting for SHAP interactions between the TEM size and concentration of nanoparticles (Fig. 4l):

$$y = \frac{-3.96x}{8.51 + x_1} + 3.00, \quad x_2 = 100 \text{ mg/L or } x_2 = 50 \text{ mg/L}$$

where  $x_1$  is the TEM size of nanoparticles,  $x_2$  is the concentration of

nanoparticles, and  $y$  is SHAP interaction value.

(5) Polynomial fitting for SHAP main effects of the TEM size of nanoparticles (Fig.

5e):

$$y = 1.66 \times 10^{-6} x^3 - 3.63 \times 10^{-4} x^2 + 2.44 \times 10^{-2} x - 4.27 \times 10^{-1}$$

where  $x$  is the TEM size of nanoparticles, and  $y$  is the SHAP main effect value.

(6) Polynomial fitting for SHAP main effects of the zeta potential of nanoparticles (Fig.

5f):

$$y = -5.71 \times 10^{-6} x^3 + 2.49 \times 10^{-4} x^2 + 1.89 \times 10^{-3} x - 8.44 \times 10^{-2}$$

where  $x$  is the zeta potential of nanoparticles, and  $y$  is the SHAP main effect value.

**Method S5.** Cost estimate of seed nanoprimer (nanoparticles)

Given the following conditions:

ZnO nanoparticle price (30nm, Macklin): RMB ¥ 308 (500 g)

Seed weight: nanoparticle volume: 1:5 g/mL

Planting seeds = 22 kg/ha

Nanoparticle concentration: 200 mg/L

so, we can estimate the nanoparticle fee.

Nanosuspension volume = 22 kg/ha × 5 L/kg = 110 L/ha

Nanoparticle weight = 110 L/ha × 200 mg/L = 22000 mg/ha = 22 g/ha

Nanoparticle fee = 22 g/ha × ¥ 308 ÷ 500 g = ¥ 13.552/ha (around \$ 2/ha)

## Figures

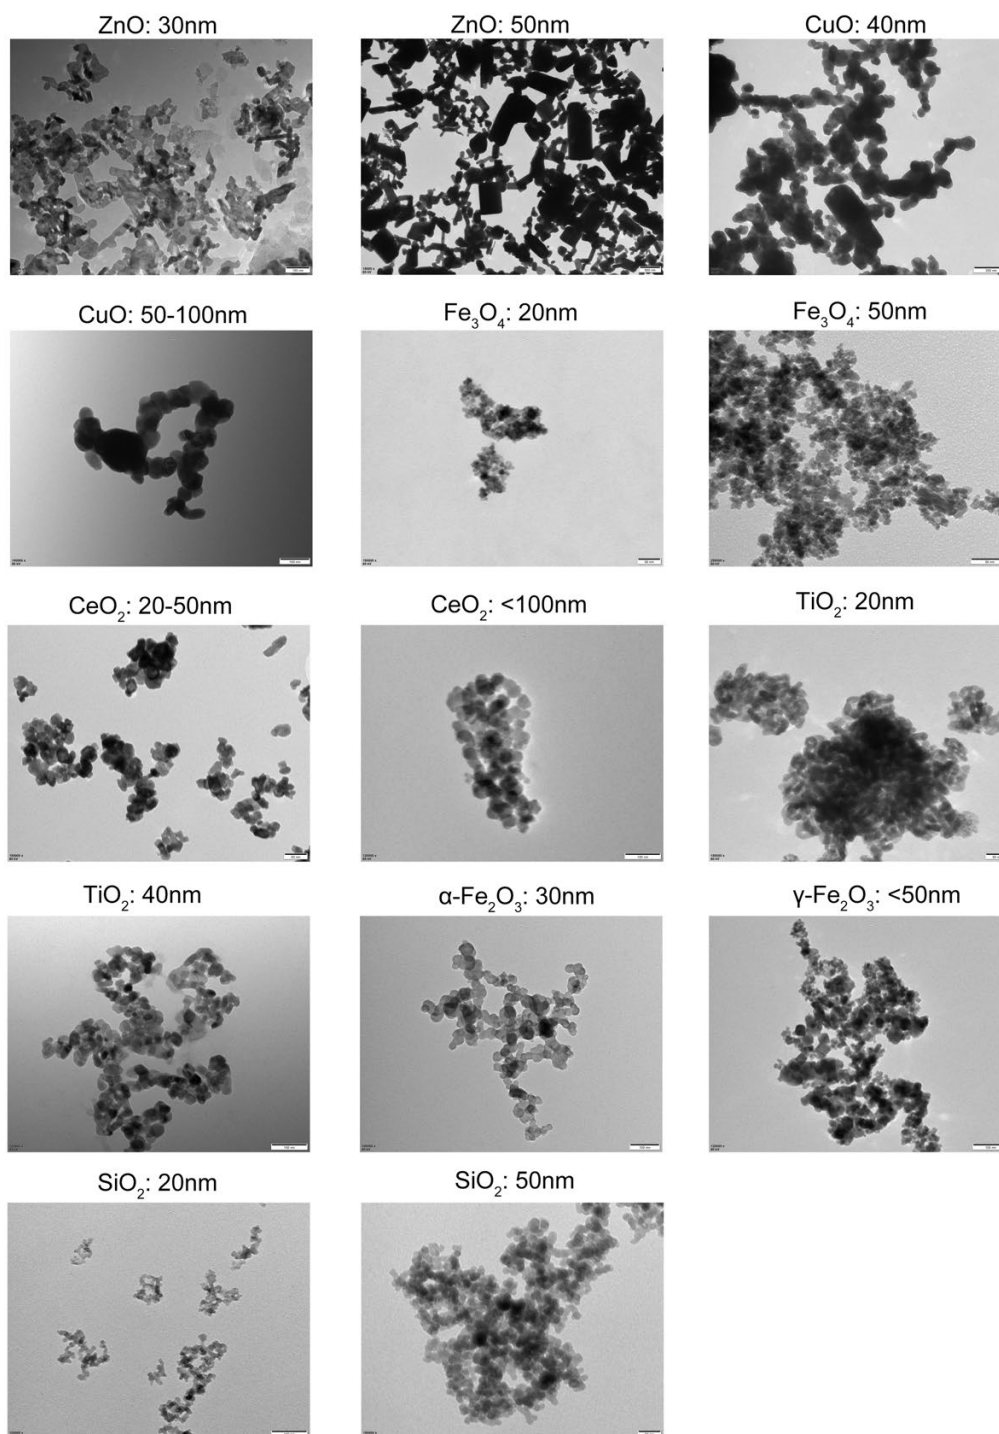

**Fig. S1:** TEM images of fourteen low-cost metalloid and metal oxide nanoparticles (SiO<sub>2</sub>, CeO<sub>2</sub>, CuO, Fe<sub>3</sub>O<sub>4</sub>, ZnO, α-Fe<sub>2</sub>O<sub>3</sub>, and γ-Fe<sub>2</sub>O<sub>3</sub> of different sizes).



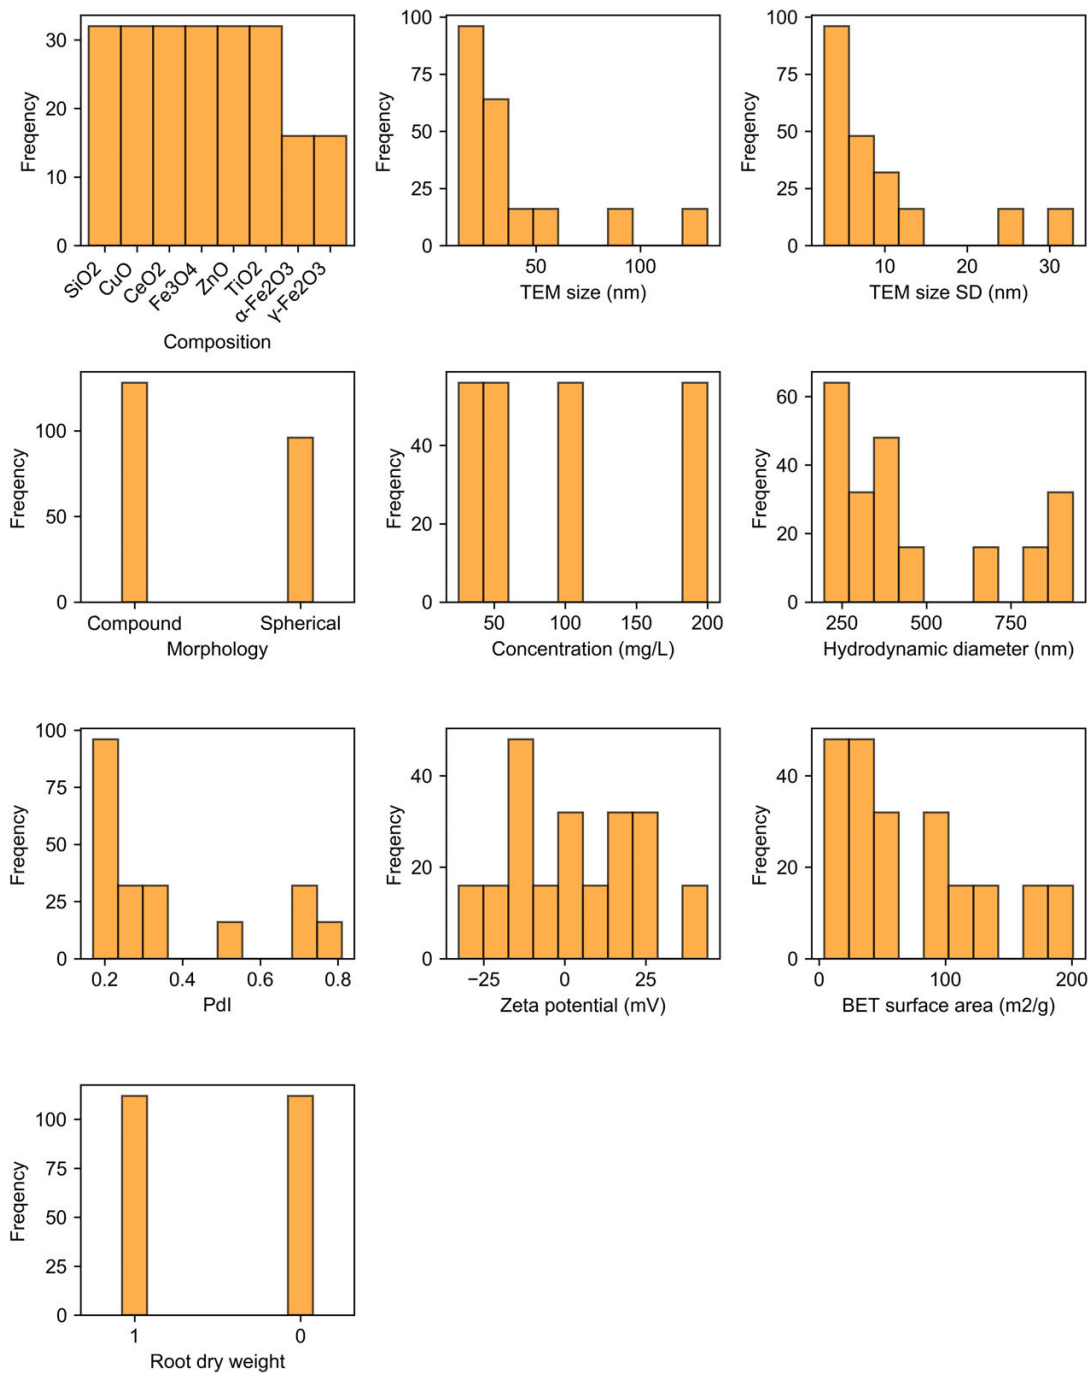

**Fig. S2.** An overview of the used features and the prediction target (root dry weight).

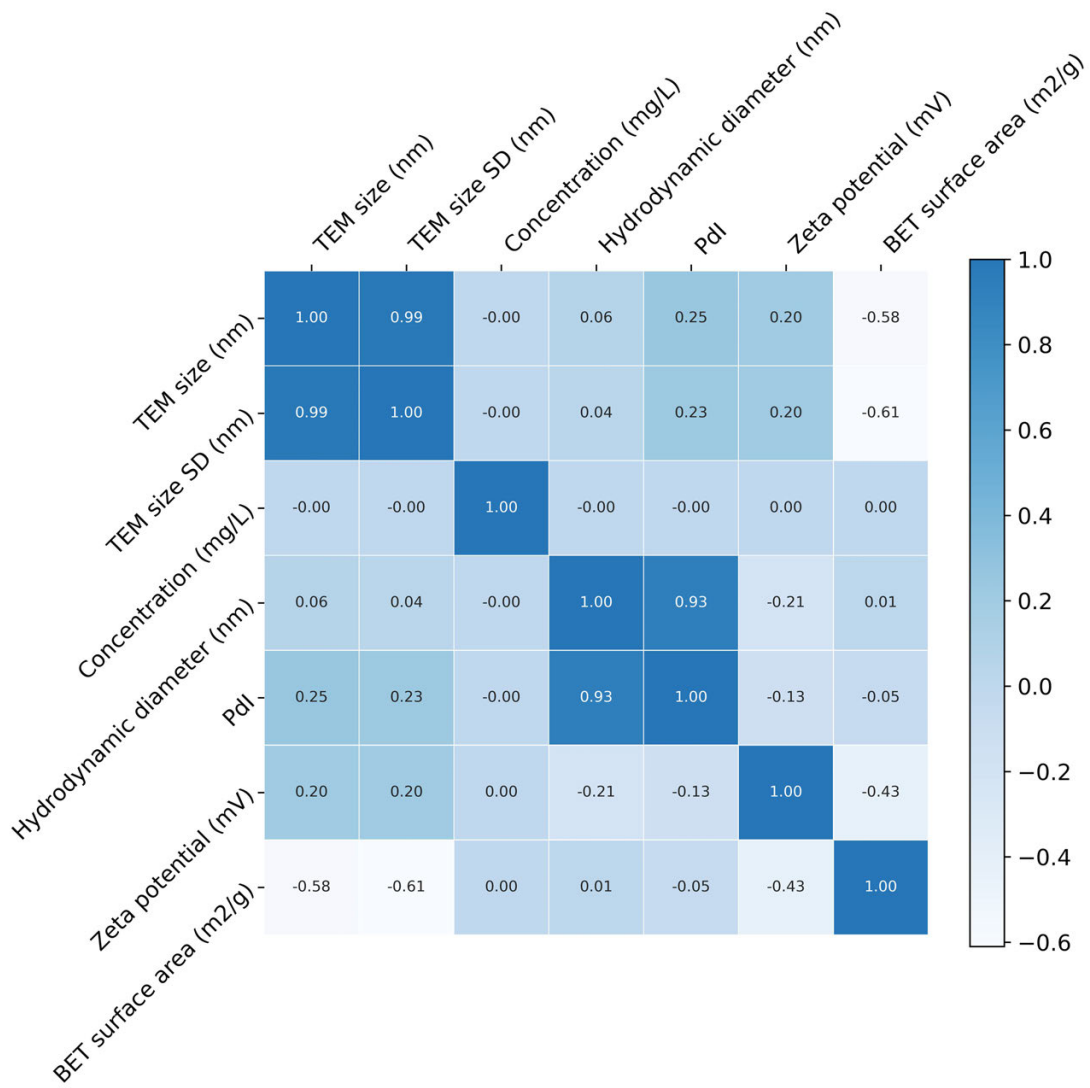

**Fig. S3.** The heatmap of the Pearson correlation coefficient among numerical factors.

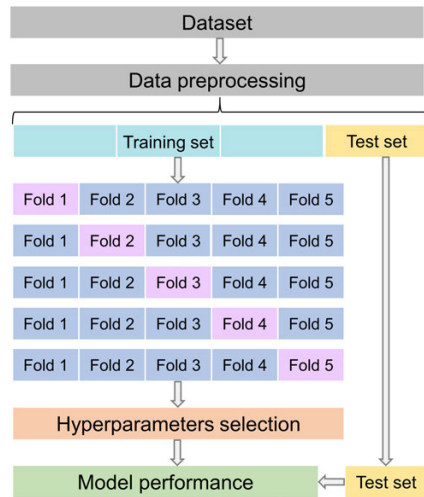

**Fig. S4.** The workflow for the establishment of the LightGBM models.

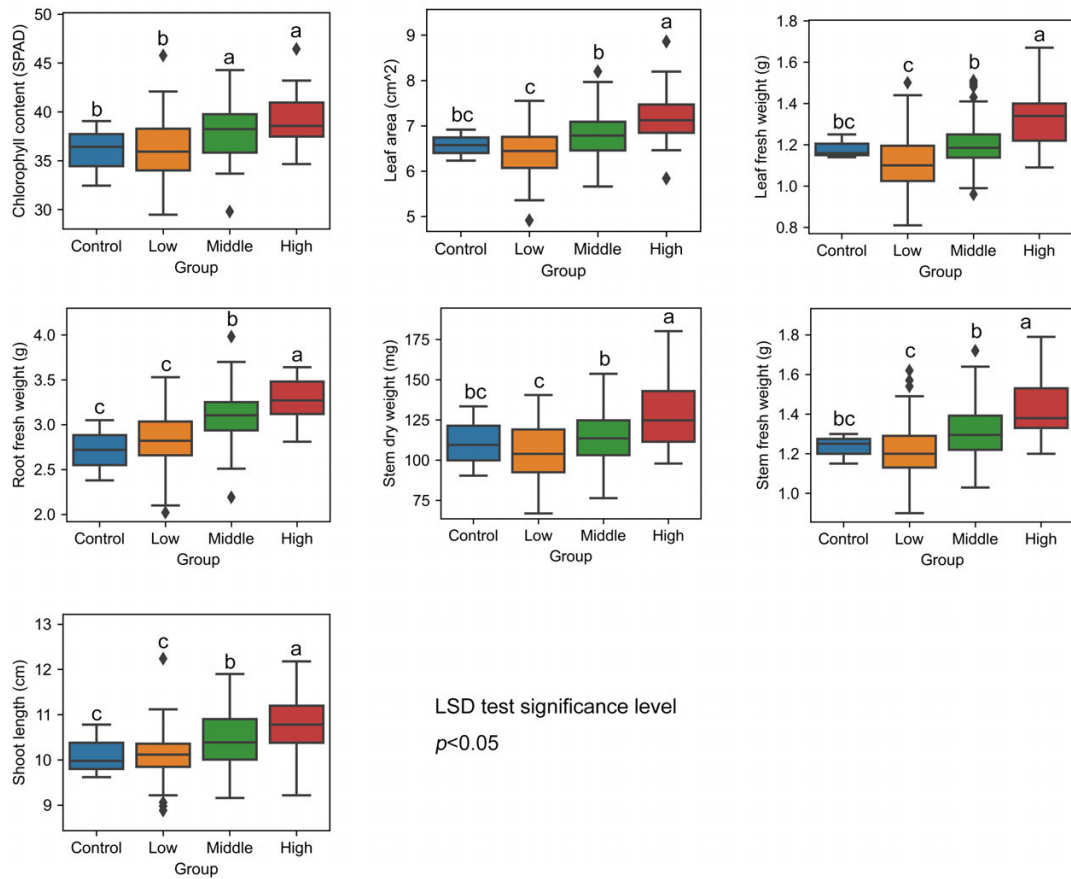

**Fig. S5.** The differences between three nanopriming groups and the control on biological endpoints under salinity stress.

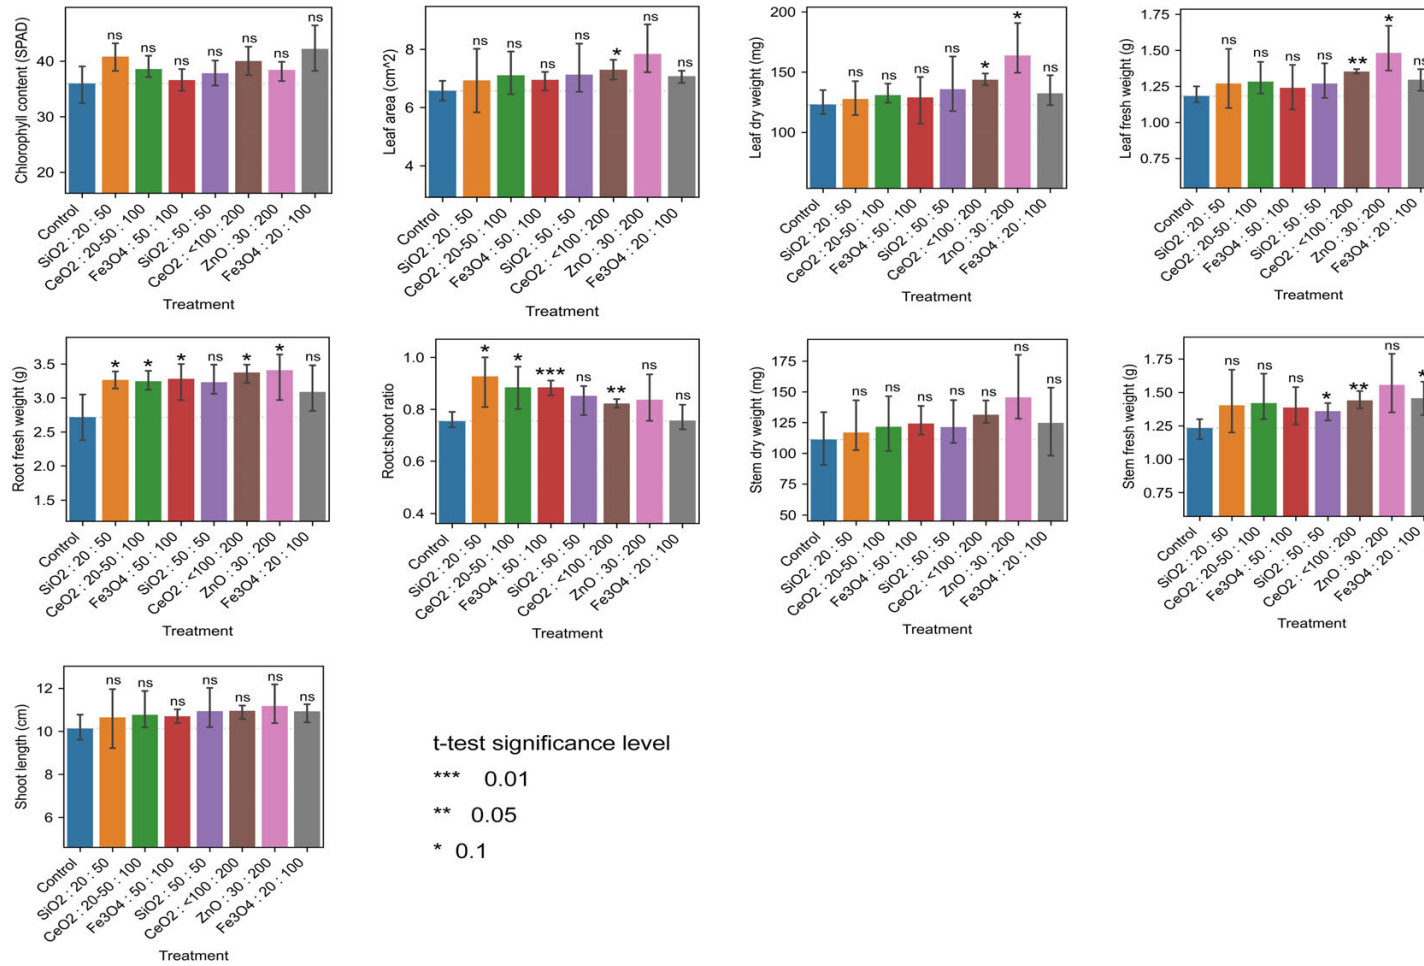

**Fig. S6.** The comparison of biological endpoints among seven treatments in the High group under salinity stress.

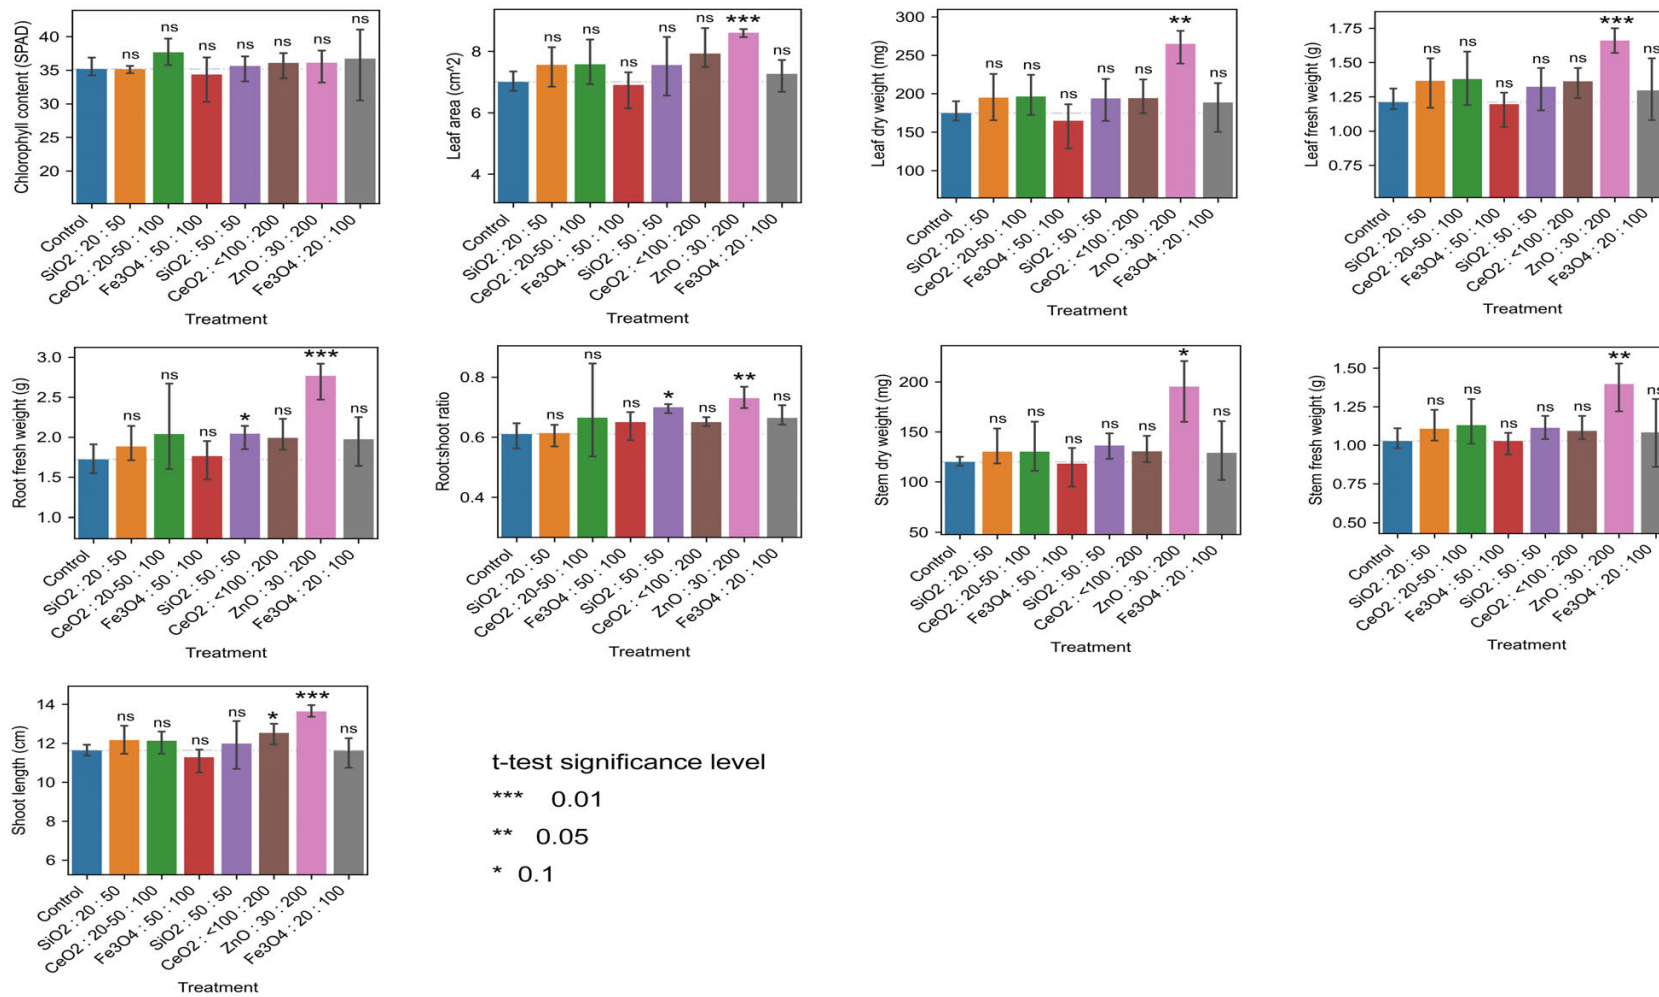

**Fig. S7.** The comparison of biological endpoints among selected treatments under combined heat-drought stress.

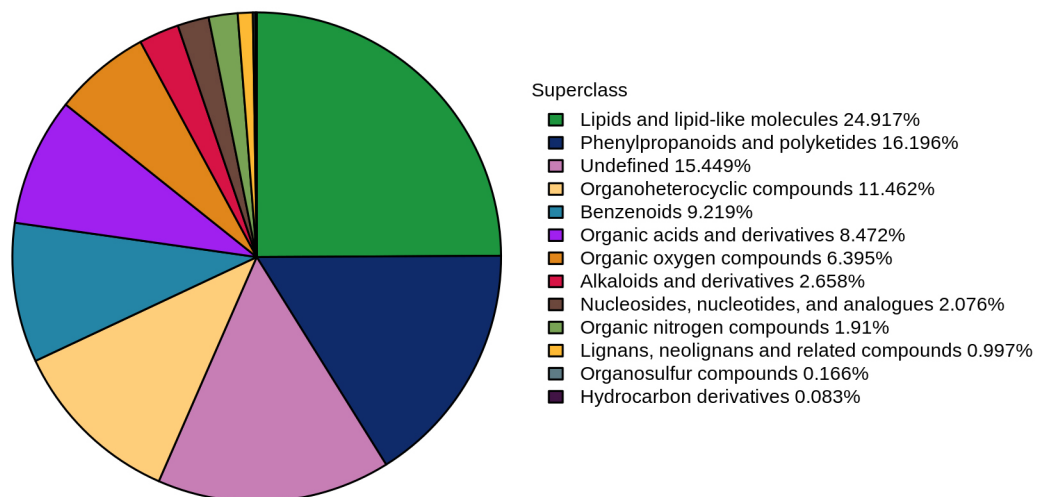

**Fig. S8.** The superclass of 1204 identified metabolites.

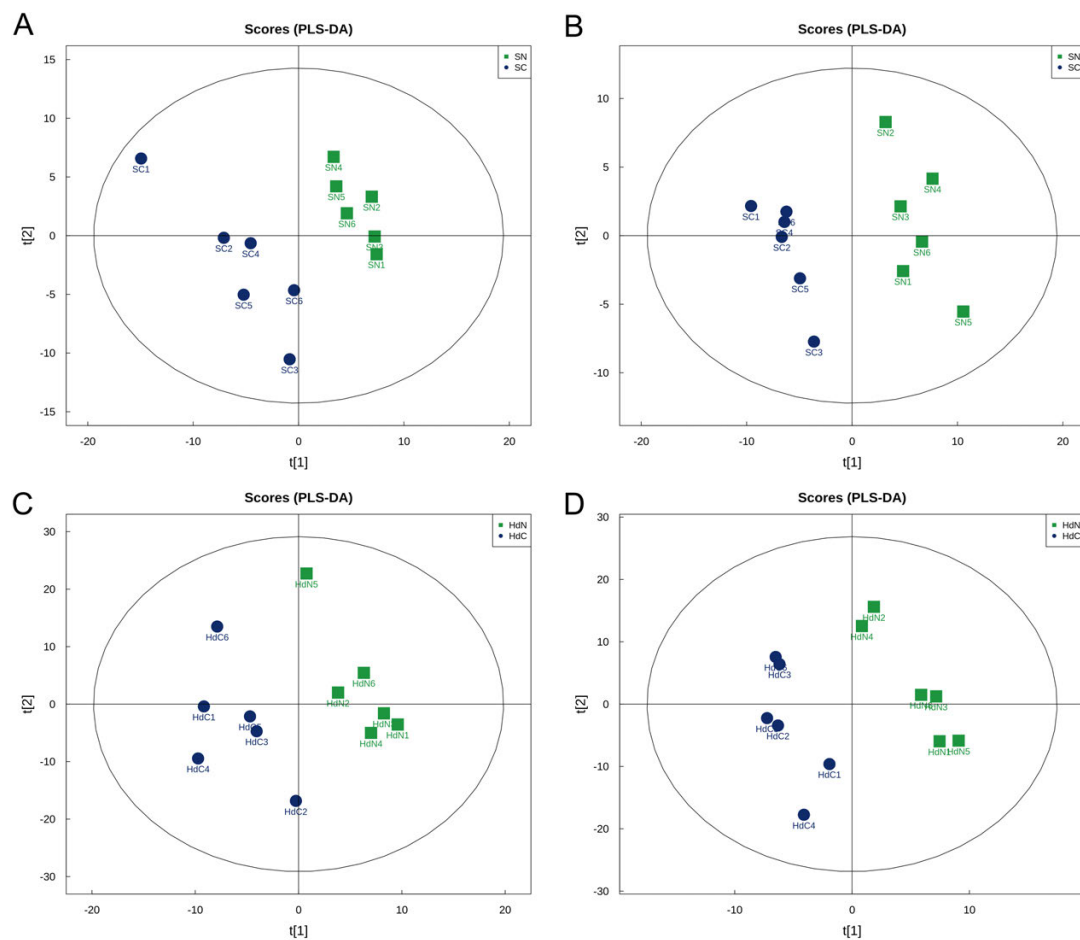

**Fig. S9.** The score plots of PLS-DA of metabolic profiles in maize leaves after SN and SC seed priming in the positive (A) and negative (B) ion modes. The score plots of PLS-DA of metabolic profiles in maize leaves after HdN and HdC seed priming in the positive (C) and negative (D) ion modes.



A

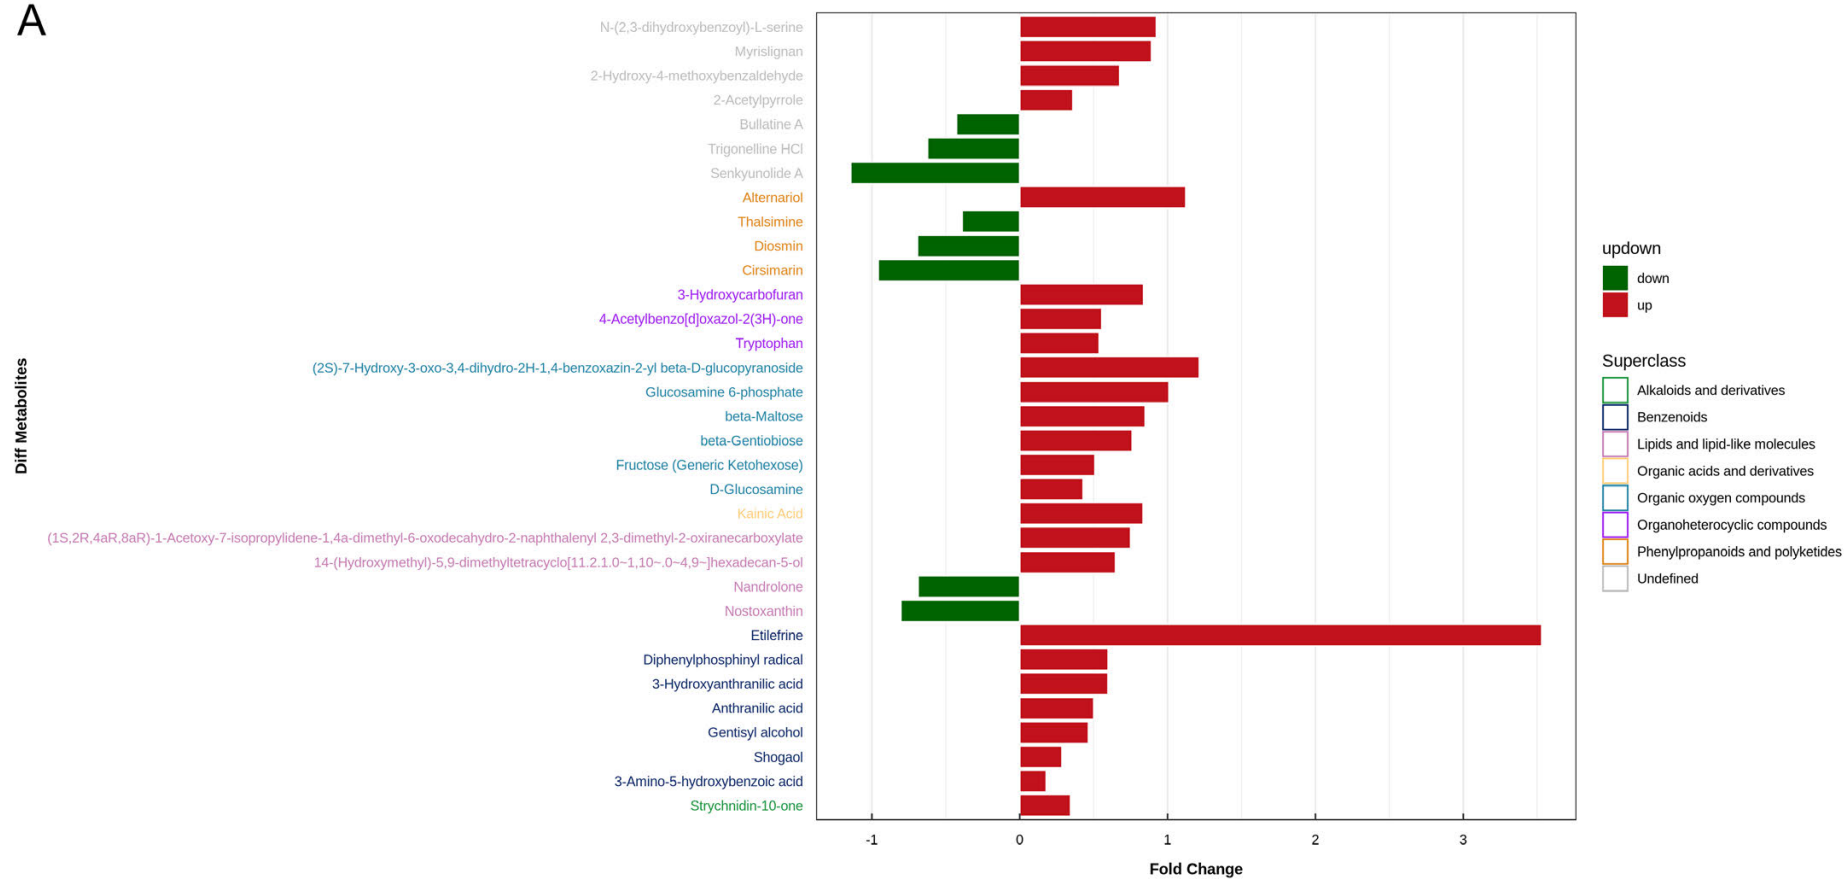

**Fig. S10 (A).** The up-regulated and down-regulated metabolites in maize leaves after SN and SC seed priming in the positive ion modes.

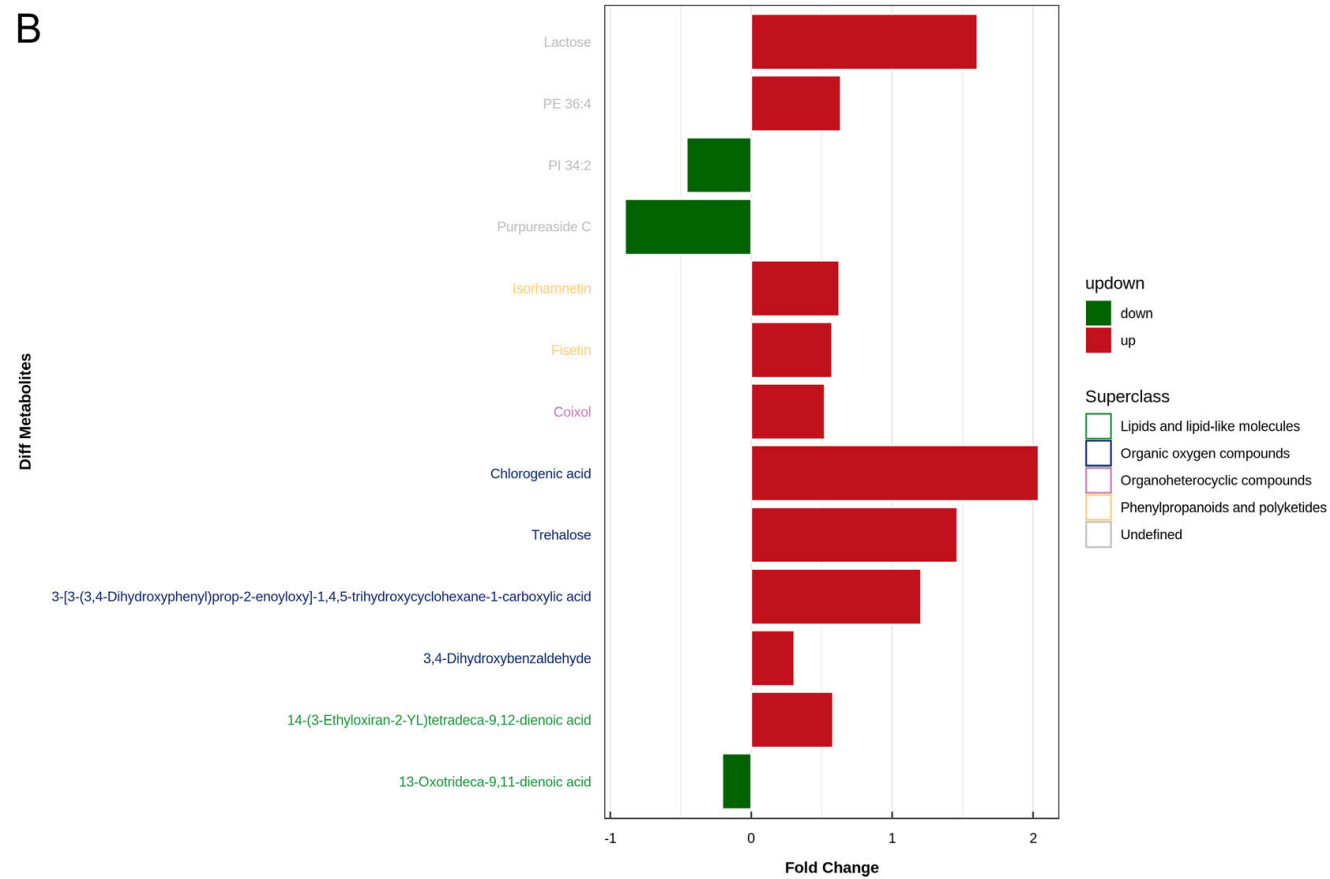

**Fig. S10 (B).** The up-regulated and down-regulated metabolites in maize leaves after SN and SC seed priming in the negative ion modes.

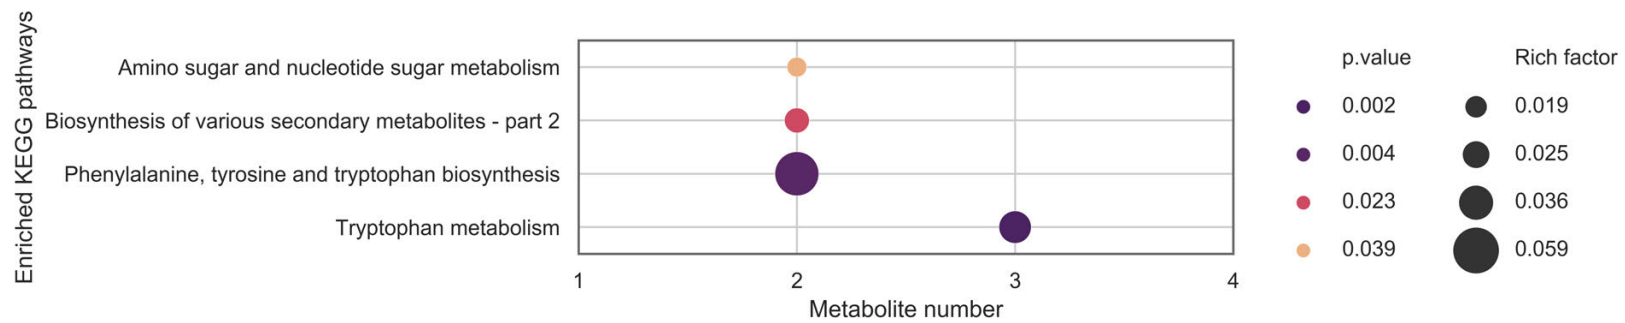

**Fig. S11.** KEGG pathway enrichment analysis based on significantly different metabolites between SN and SC.

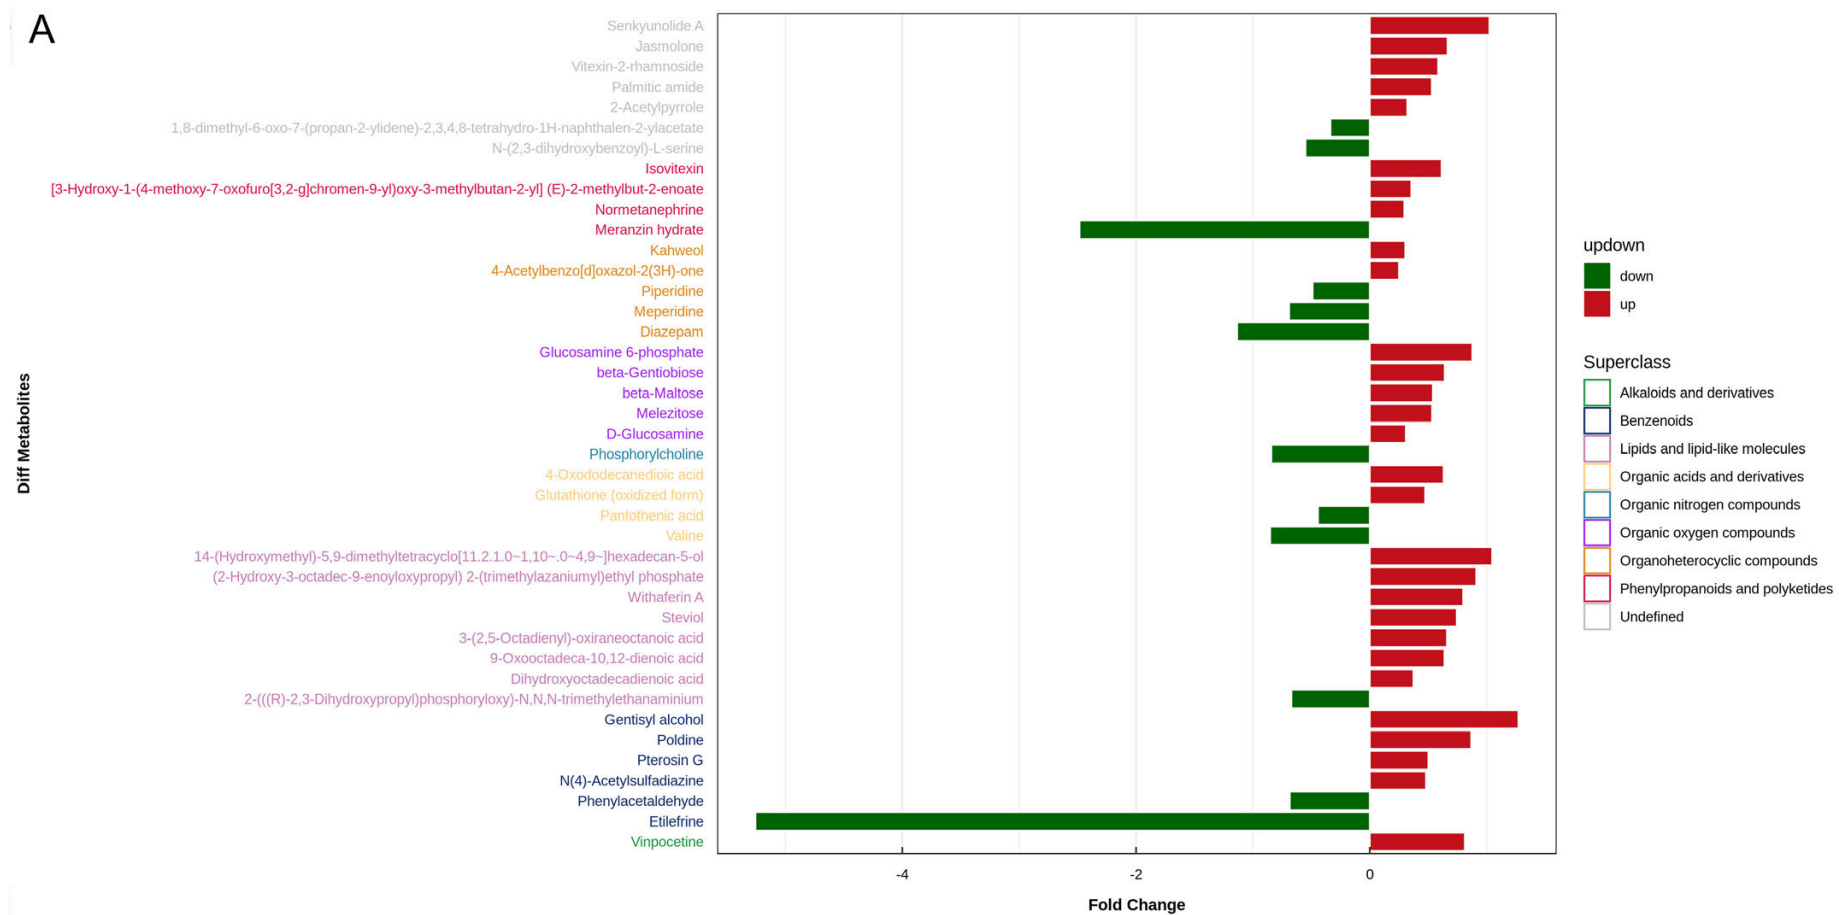

**Fig. S12 (A).** The up-regulated and down-regulated metabolites in maize leaves after HdN and HdC seed priming in the positive ion modes.

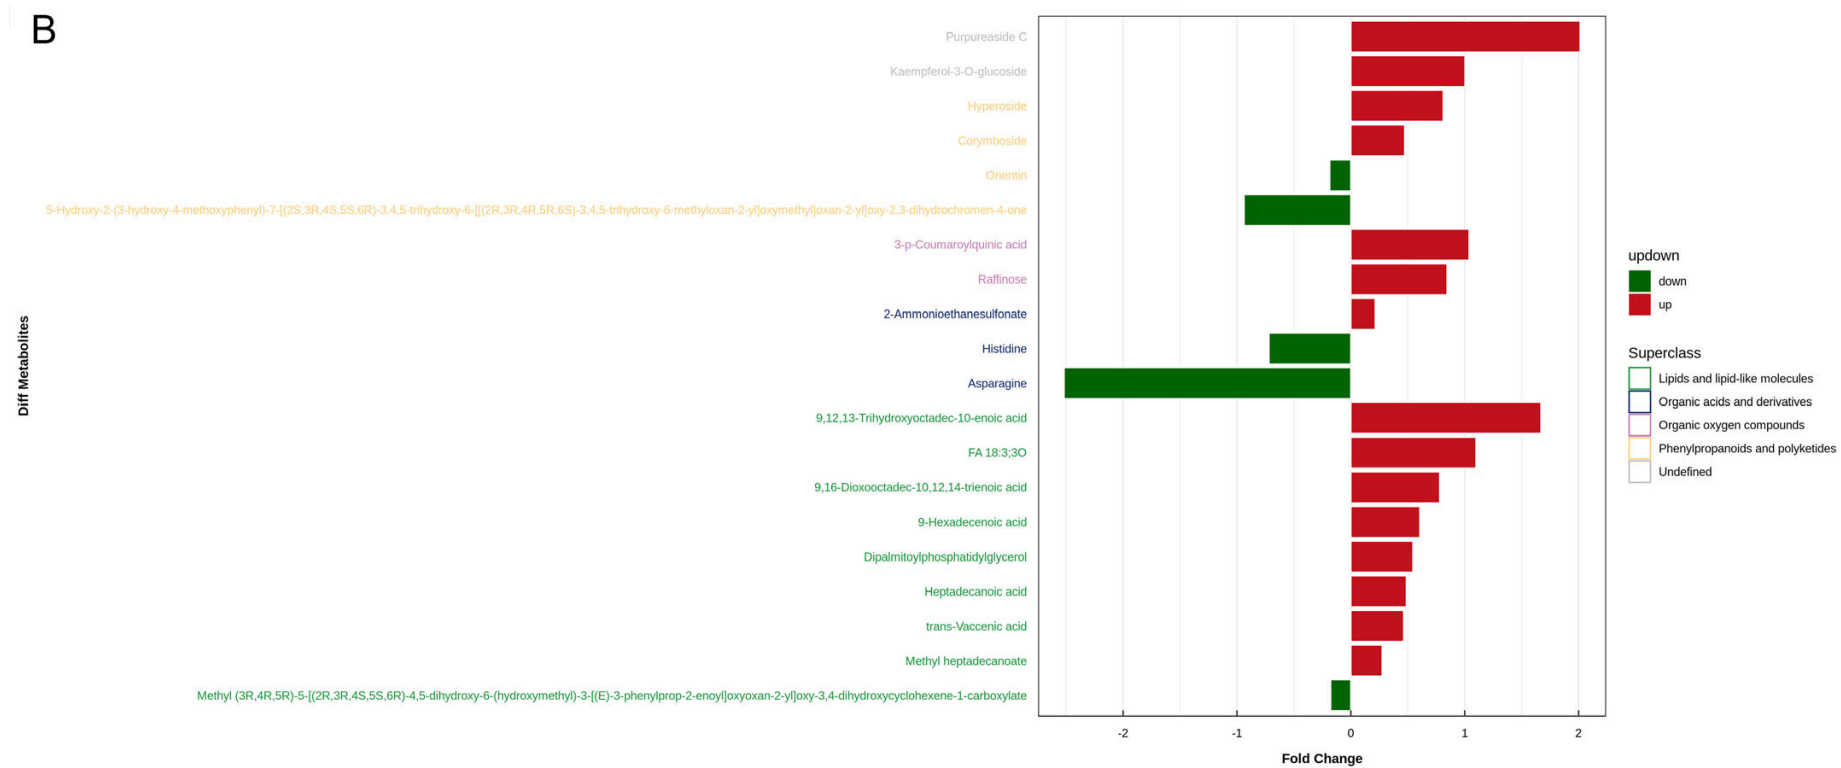

**Fig. S12 (B).** The up-regulated and down-regulated metabolites in maize leaves after HdN and HdC seed priming in the negative ion modes.

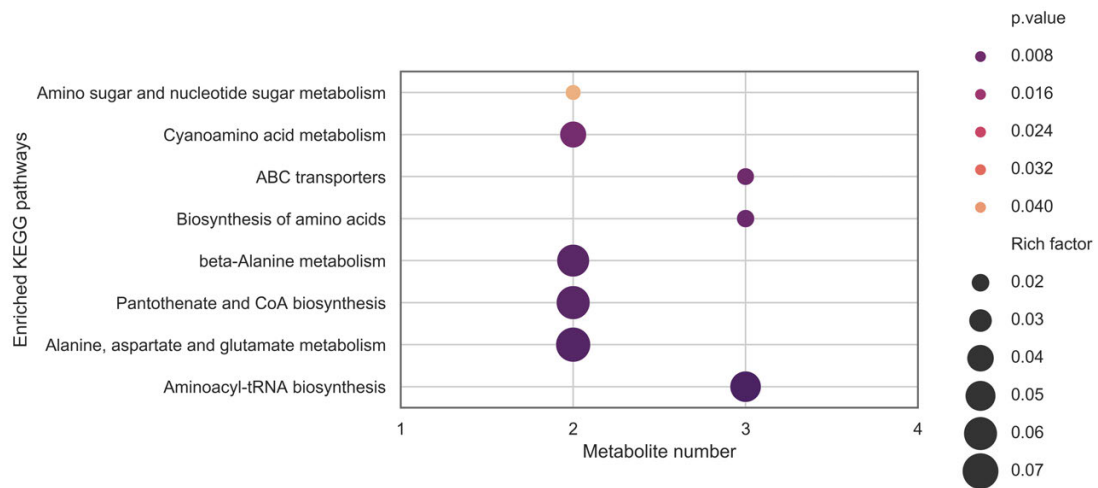

**Fig. S13.** KEGG pathway enrichment analysis based on significantly different metabolites between HdN and HdC.

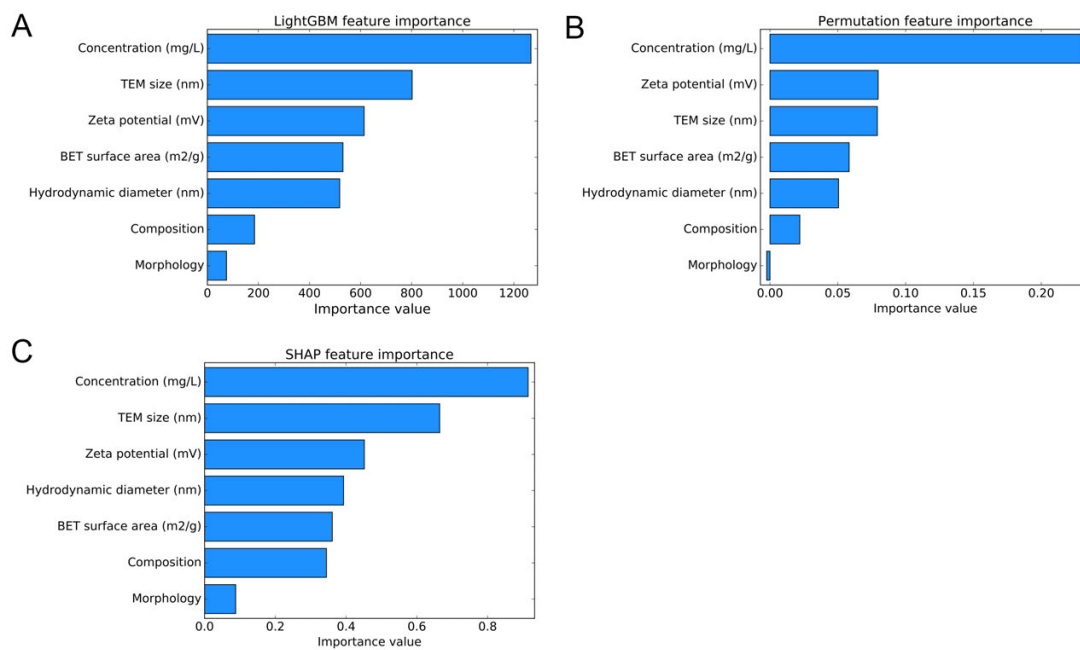

**Fig. S14.** The absolute values of feature importance obtained by LightGBM feature importance (A), permutation feature importance (B), and SHAP feature importance (C).

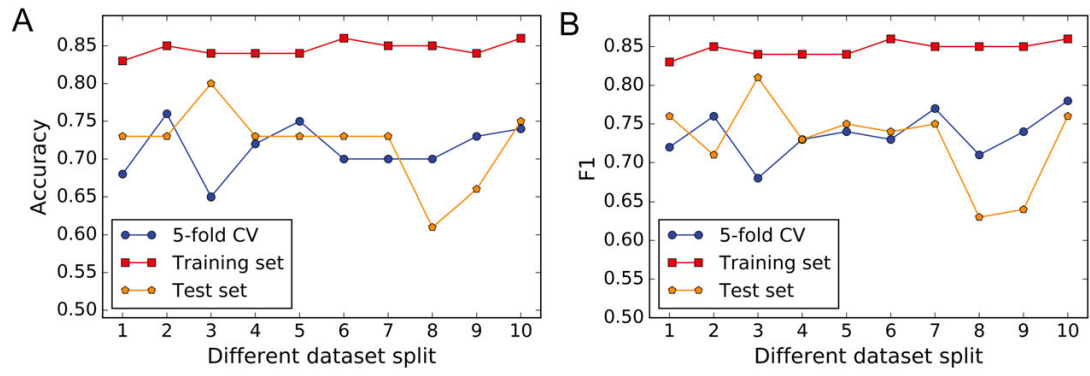

**Fig. S15.** The accuracy (A) and F1 score (B) of established models on ten dataset splits.



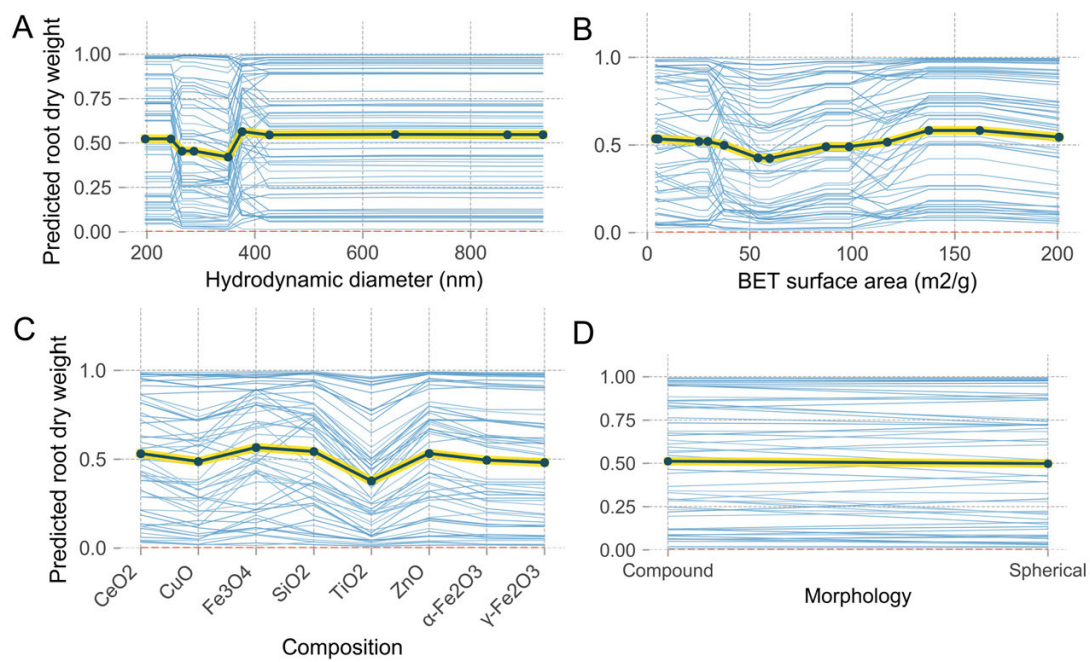

**Fig. S16.** PDP and ICE plots of hydrodynamic diameter (A), BET surface area (B), composition (C), and morphology (D).

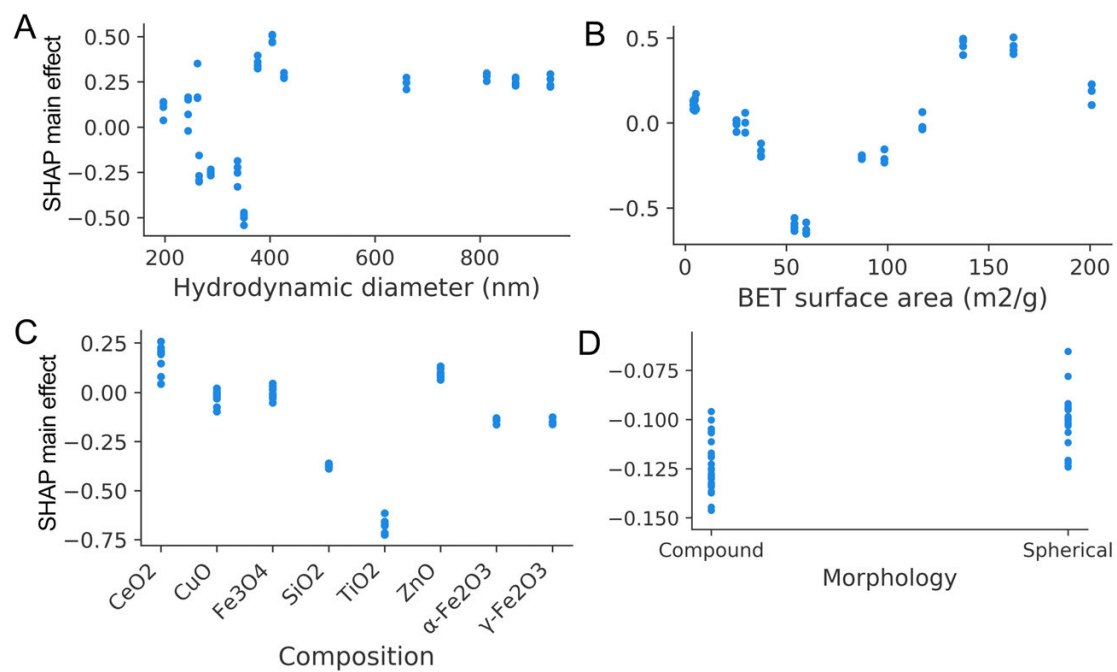

**Fig. S17.** SHAP main effects of hydrodynamic diameter (A), BET surface area (B), composition (C), and morphology (D).

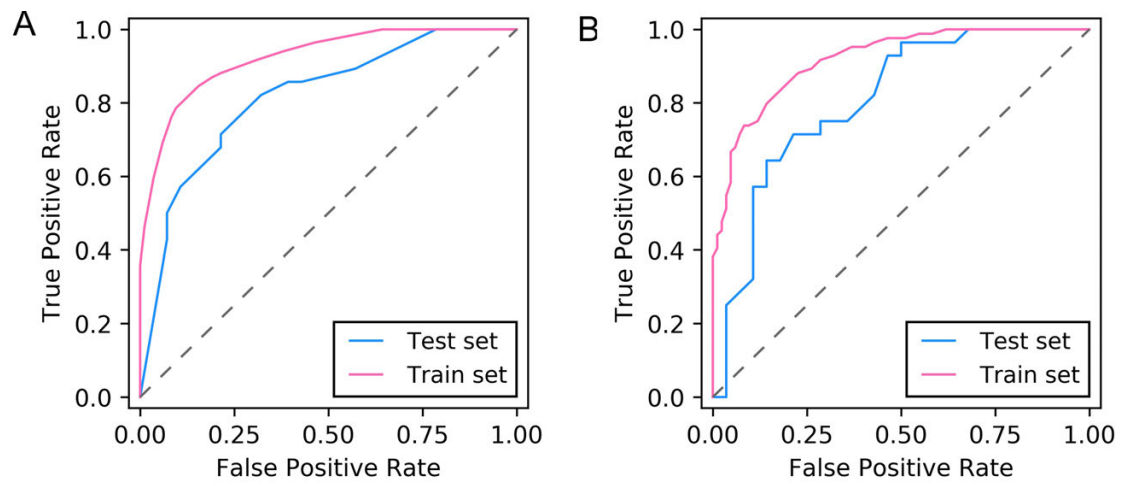

**Fig. S18.** ROC curve of the decision tree (A) and RuleFit (B) models trained on the fifth dataset split.

X[0]: Concentration (mg/L)  
 X[1]: TEM size (nm)  
 X[2]: Zeta potential (mV)

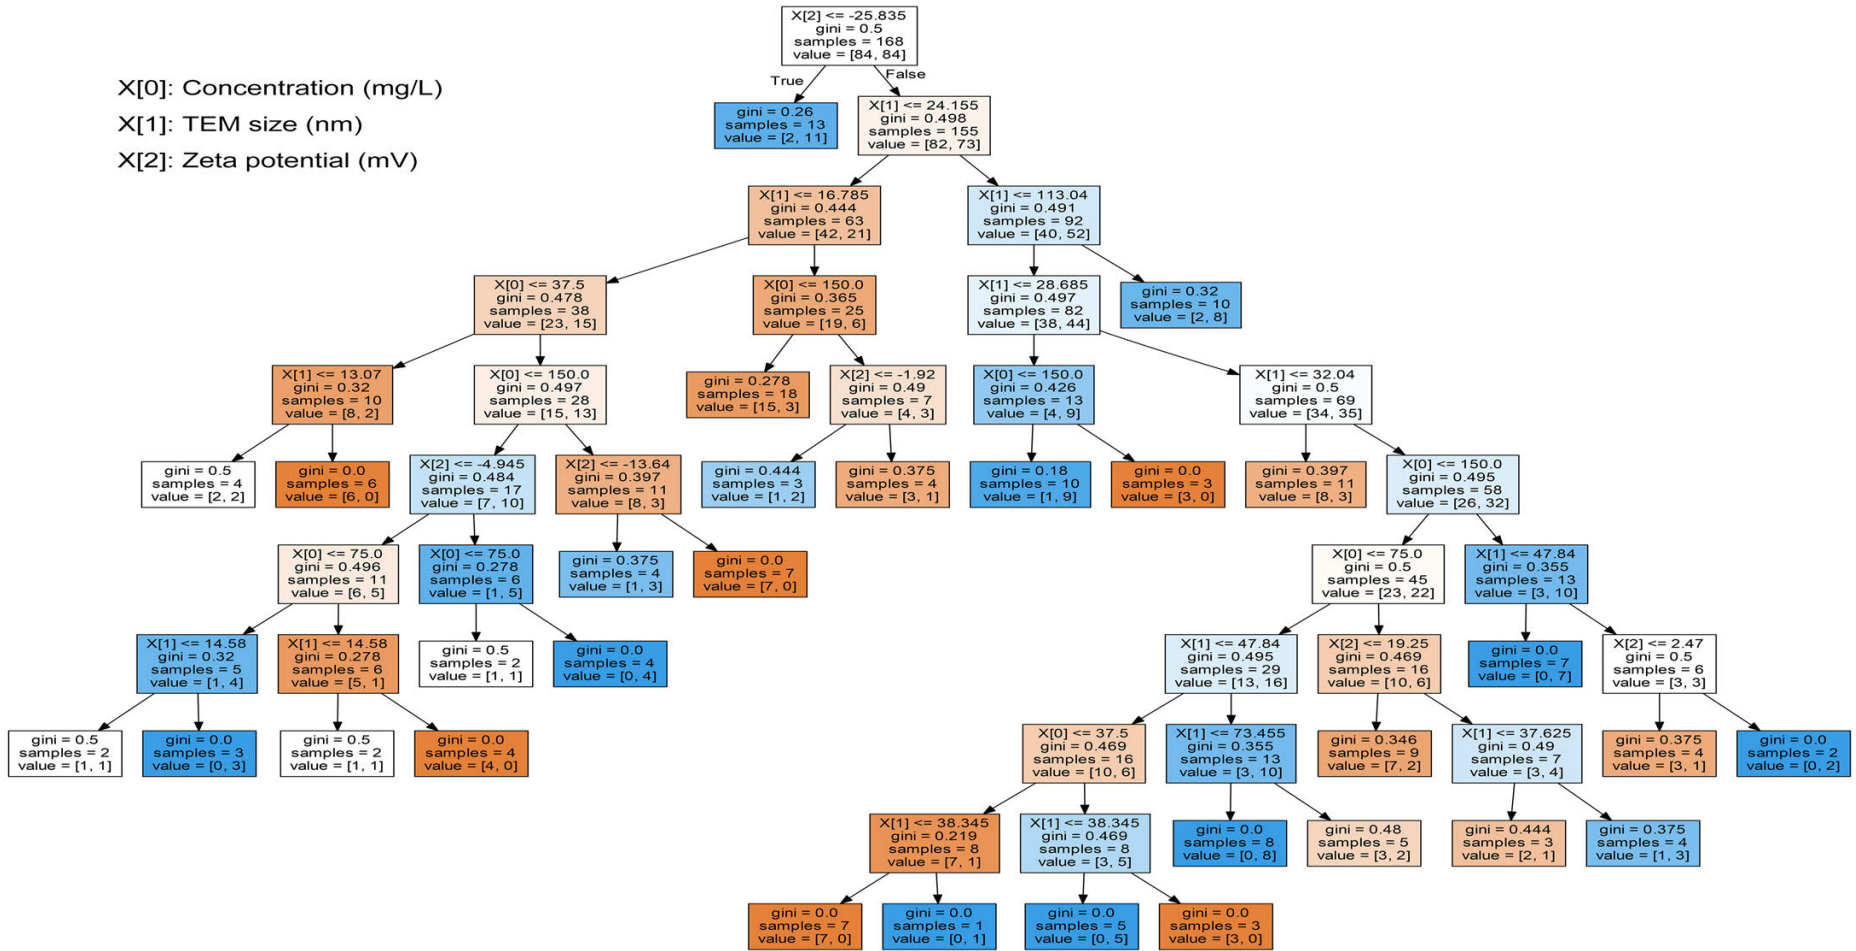

**Fig. S19.** The decision tree structure for root dry weight prediction based on three important features identified by post hoc interpretation of LightGBM models.

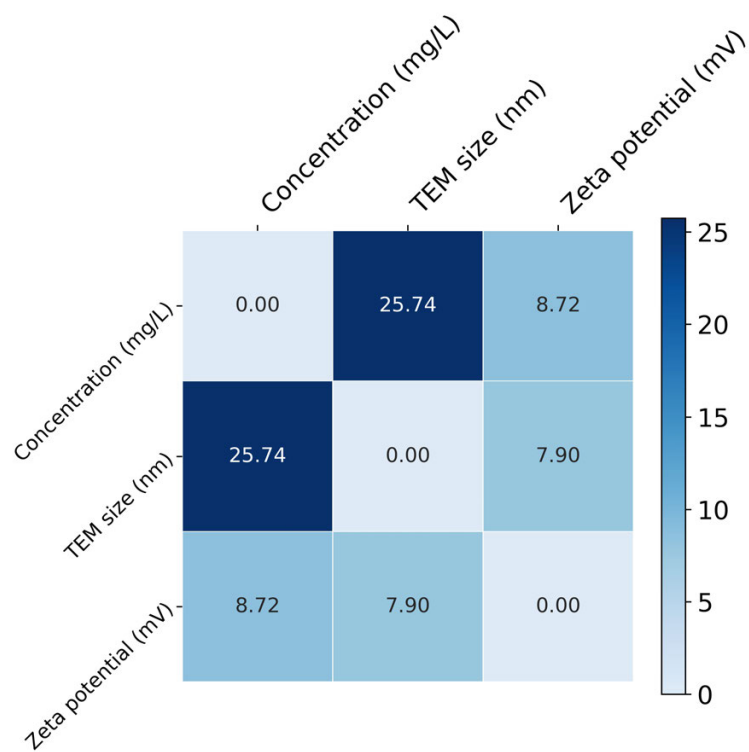

**Fig. S20.** SHAP interaction values of all features in the decision tree model.

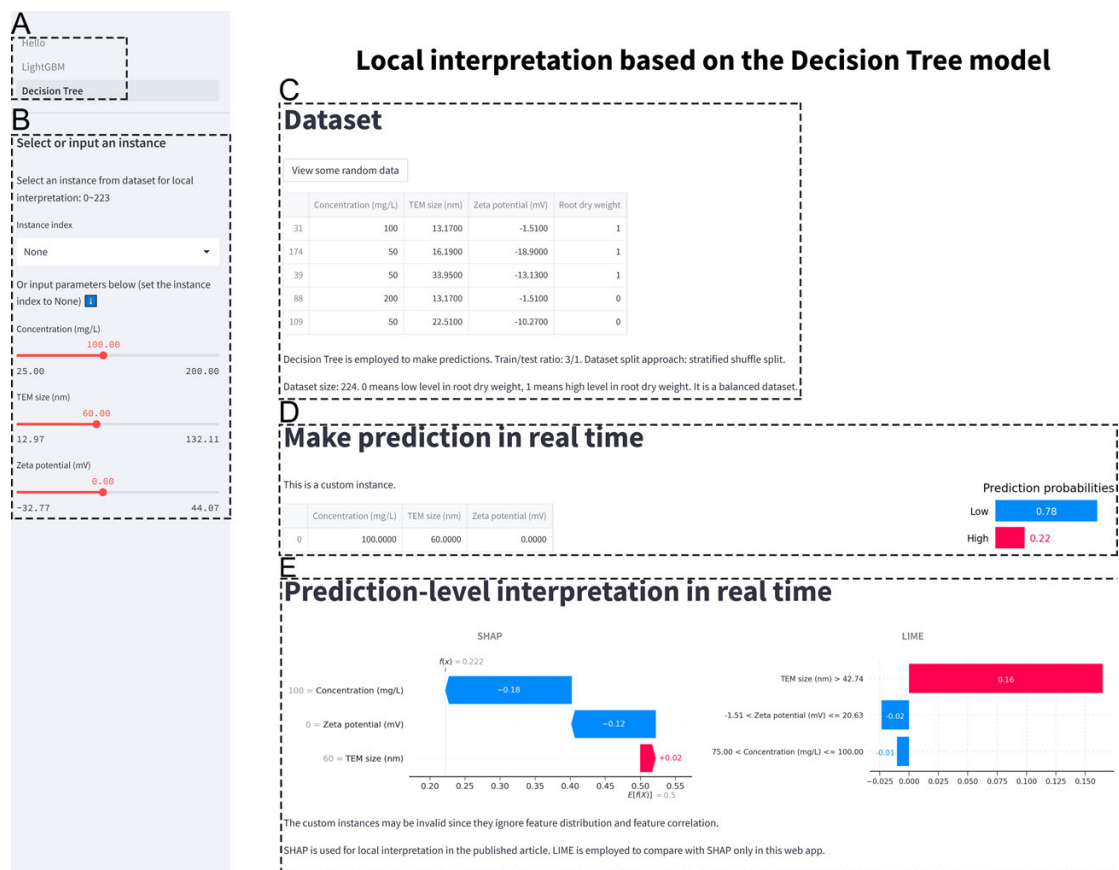

**Fig. S21.** The online interactive website for prediction-level interpretation (<https://seed-nanopriming-isar.streamlit.app/>). A, Navigation to different pages on this website. Hello: welcome page. LightGBM: local interpretation in the LightGBM model. Decision tree: local interpretation in the decision tree model. B, Select an instance from the used dataset or customize a sample. C, Dataset introduction and some random instances. D, Show the selected/custom instance and make a prediction. E, Prediction-level interpretation for this prediction.

## Tables

**Table S1.1.** An overview of the used dataset and the prediction target (root dry weight).

| Feature/target                       | Percentage/range                  |
|--------------------------------------|-----------------------------------|
| Composition                          |                                   |
| <i>SiO<sub>2</sub></i>               | 14.29%                            |
| <i>CuO</i>                           | 14.29%                            |
| <i>CeO<sub>2</sub></i>               | 14.29%                            |
| <i>Fe<sub>3</sub>O<sub>4</sub></i>   | 14.29%                            |
| <i>ZnO</i>                           | 14.29%                            |
| <i>TiO<sub>2</sub></i>               | 14.29%                            |
| <i>α-Fe<sub>2</sub>O<sub>3</sub></i> | 7.14%                             |
| <i>γ-Fe<sub>2</sub>O<sub>3</sub></i> | 7.14%                             |
| Morphology                           |                                   |
| <i>Compound</i>                      | 57.14%                            |
| <i>Spherical</i>                     | 42.86%                            |
| TEM size                             | 12.97~132.11 nm                   |
| TEM size SD                          | 2.65~32.82 nm                     |
| Concentration                        | 25, 50, 100, 200 mg/L             |
| Hydrodynamic diameter                | 197~933.73 nm                     |
| PdI                                  | 0.17~0.81                         |
| Zeta potential                       | -32.77~44.07 mV                   |
| BET surface area                     | 4.07~200.84 m <sup>2</sup> /g     |
| Target: Root dry weight              | 1 for high level, 0 for low level |

**Table S1.2.** Detailed analysis of the numerical features collected in this study.

|              | TEM size<br>(nm) | TEM size<br>SD (nm) | Concentra<br>tion<br>(mg/L) | Hydrodyn<br>amic<br>diameter<br>(nm) | PdI      | Zeta<br>potential<br>(mV) | BET<br>surface<br>area<br>(m <sup>2</sup> /g) |
|--------------|------------------|---------------------|-----------------------------|--------------------------------------|----------|---------------------------|-----------------------------------------------|
| <b>count</b> | 224              | 224                 | 224                         | 224                                  | 224      | 224                       | 224                                           |
| <b>mean</b>  | 39.19571         | 9.621429            | 93.75                       | 459.0236                             | 0.369286 | 3.439286                  | 73.07857                                      |
| <b>std</b>   | 32.9445          | 8.734165            | 67.17389                    | 241.9576                             | 0.215105 | 20.58079                  | 60.58844                                      |
| <b>min</b>   | 12.97            | 2.65                | 25                          | 197                                  | 0.17     | -32.77                    | 4.07                                          |
| <b>25%</b>   | 17.38            | 3.11                | 43.75                       | 264.87                               | 0.22     | -12.93                    | 25.31                                         |
| <b>50%</b>   | 28.685           | 6.89                | 75                          | 363.47                               | 0.26     | 1.595                     | 56.85                                         |
| <b>75%</b>   | 42.74            | 10.98               | 125                         | 660                                  | 0.54     | 20.63                     | 117.09                                        |
| <b>max</b>   | 132.11           | 32.82               | 200                         | 933.73                               | 0.81     | 44.07                     | 200.84                                        |

**Table S2.** The version of the main software and packages used in this study.

| <b>Software/packages</b> | <b>Version</b> |
|--------------------------|----------------|
| Python                   | 3.10.8         |
| scikit-learn             | 1.1.2          |
| shap                     | 0.39.0         |
| PDPbox                   | 0.2.1          |
| imodels                  | 1.2.5          |
| lime                     | 0.2.0.1        |
| scipy                    | 1.7.3          |
| numpy                    | 1.21.5         |
| streamlit                | 1.13.0         |
| R                        | 4.2.2          |
| agricolae                | 1.3-5          |
| ropls                    | 1.30.0         |



**Table S3.** The determined model hyperparameters of LightGBM models.

| Random state | min_data_in_leaf | min_sum_hessian_in_leaf | max_bin | max_depth | num_leaves | learning_rate |
|--------------|------------------|-------------------------|---------|-----------|------------|---------------|
| 1            | 10               | 1                       | 5       | 6         | 9          | 0.060         |
| 2            | 10               | 1                       | 8       | 3         | 4          | 0.060         |
| 3            | 7                | 1                       | 9       | 4         | 5          | 0.067         |
| 4            | 7                | 1                       | 6       | 4         | 6          | 0.049         |
| 5            | 1                | 3                       | 14      | 4         | 5          | 0.081         |
| 6            | 15               | 3                       | 15      | 4         | 6          | 0.064         |
| 7            | 17               | 1                       | 15      | 5         | 7          | 0.100         |
| 8            | 1                | 3                       | 15      | 6         | 9          | 0.100         |
| 9            | 1                | 3                       | 10      | 6         | 9          | 0.141         |
| 10           | 14               | 2                       | 6       | 4         | 5          | 0.074         |

**Table S4.** Three group division of 56 nanopriming treatments based on the SRI under salinity stress.

| Group       | Treatments (Composition: Size(nm) : Concentration(mg/L))                                                                                                                                                                                                                                                                                                                                                                                                                                                                                                                                                                                                                                                                                                                                                                                                                                                                                                                                                                                                                                                                                                                                                                                                                                                                                                                                            | Average SRI |
|-------------|-----------------------------------------------------------------------------------------------------------------------------------------------------------------------------------------------------------------------------------------------------------------------------------------------------------------------------------------------------------------------------------------------------------------------------------------------------------------------------------------------------------------------------------------------------------------------------------------------------------------------------------------------------------------------------------------------------------------------------------------------------------------------------------------------------------------------------------------------------------------------------------------------------------------------------------------------------------------------------------------------------------------------------------------------------------------------------------------------------------------------------------------------------------------------------------------------------------------------------------------------------------------------------------------------------------------------------------------------------------------------------------------------------|-------------|
| High (7)    | ZnO:30:200, CeO <sub>2</sub> :<100:200, SiO <sub>2</sub> :20:50, CeO <sub>2</sub> :20-50:100, SiO <sub>2</sub> :50:50, Fe <sub>3</sub> O <sub>4</sub> :50:100, Fe <sub>3</sub> O <sub>4</sub> :20:100                                                                                                                                                                                                                                                                                                                                                                                                                                                                                                                                                                                                                                                                                                                                                                                                                                                                                                                                                                                                                                                                                                                                                                                               | 11.39       |
| Middle (16) | CeO <sub>2</sub> :<100:50, $\alpha$ -Fe <sub>2</sub> O <sub>3</sub> :30:100, CuO:40:25, SiO <sub>2</sub> :20:200, ZnO:50:200, SiO <sub>2</sub> :50:100, SiO <sub>2</sub> :50:200, $\alpha$ -Fe <sub>2</sub> O <sub>3</sub> :30:25, CeO <sub>2</sub> :20-50:25, $\alpha$ -Fe <sub>2</sub> O <sub>3</sub> :30:200, ZnO:30:50, ZnO:50:50, CuO:40:50, CeO <sub>2</sub> :20-50:50, ZnO:50:25, SiO <sub>2</sub> :50:25, SiO <sub>2</sub> :20:25, Fe <sub>3</sub> O <sub>4</sub> :50:200, CeO <sub>2</sub> :<100:100, SiO <sub>2</sub> :20:100, ZnO:30:25, CeO <sub>2</sub> :20-50:200, CuO:40:200, Fe <sub>3</sub> O <sub>4</sub> :20:50, CuO:50-100:25, $\alpha$ -Fe <sub>2</sub> O <sub>3</sub> :30:50, Fe <sub>3</sub> O <sub>4</sub> :50:25, TiO <sub>2</sub> :40:25, TiO <sub>2</sub> :20:25, $\gamma$ -Fe <sub>2</sub> O <sub>3</sub> :<50:100, CeO <sub>2</sub> :<100:25, TiO <sub>2</sub> :20:50, TiO <sub>2</sub> :40:100, TiO <sub>2</sub> :40:200, Fe <sub>3</sub> O <sub>4</sub> :20:200, CuO:40:100, $\gamma$ -Fe <sub>2</sub> O <sub>3</sub> :<50:50, $\gamma$ -Fe <sub>2</sub> O <sub>3</sub> :<50:25, TiO <sub>2</sub> :20:200, CuO:50-100:50, CuO:50-100:200, ZnO:30:100, CuO:50-100:100, ZnO:50:100, TiO <sub>2</sub> :40:50, Fe <sub>3</sub> O <sub>4</sub> :20:25, Fe <sub>3</sub> O <sub>4</sub> :50:50, $\gamma$ -Fe <sub>2</sub> O <sub>3</sub> :<50:200, TiO <sub>2</sub> :20:100 | 10.74       |
| Low (33)    |                                                                                                                                                                                                                                                                                                                                                                                                                                                                                                                                                                                                                                                                                                                                                                                                                                                                                                                                                                                                                                                                                                                                                                                                                                                                                                                                                                                                     | 9.99        |

**Table S5.** The 7-fold cross-validation results of established PLS-DA and OPLS-DA models.

| <b>Ion mode</b> | <b>Type</b> | <b>R<sup>2</sup>X(cum)</b> | <b>R<sup>2</sup>Y(cum)</b> | <b>Q<sup>2</sup>(cum)</b> | <b>Treatments</b> |
|-----------------|-------------|----------------------------|----------------------------|---------------------------|-------------------|
| positive        | PLS-DA      | 0.679                      | 0.994                      | 0.912                     | SN_vs_SC          |
| positive        | OPLS-DA     | 0.679                      | 0.994                      | 0.725                     | SN_vs_SC          |
| positive        | PLS-DA      | 0.85                       | 0.99                       | 0.895                     | HdN_vs_HdC        |
| positive        | OPLS-DA     | 0.85                       | 0.99                       | 0.85                      | HdN_vs_HdC        |
| negative        | PLS-DA      | 0.508                      | 0.954                      | 0.744                     | SN_vs_SC          |
| negative        | OPLS-DA     | 0.683                      | 0.994                      | 0.87                      | SN_vs_SC          |
| negative        | PLS-DA      | 0.769                      | 0.978                      | 0.773                     | HdN_vs_HdC        |
| negative        | OPLS-DA     | 0.769                      | 0.978                      | 0.899                     | HdN_vs_HdC        |

**Table S6.** The rules determined by the RuleFit algorithm.

| No. | Rule                                                                                                                                                               | Type | Coefficient | Support | Importance |
|-----|--------------------------------------------------------------------------------------------------------------------------------------------------------------------|------|-------------|---------|------------|
| 39  | Concentration (mg/L) $\leq$ 75.0 and Concentration (mg/L) $>$ 37.5 and Zeta potential (mV) $\leq$ 5.565                                                            | rule | 2.2548      | 0.1310  | 0.7607     |
| 3   | Concentration (mg/L) $\leq$ 37.5 and TEM size (nm) $\leq$ 38.345 and TEM size (nm) $>$ 28.685                                                                      | rule | -3.0894     | 0.0536  | 0.6956     |
| 24  | Concentration (mg/L) $>$ 150.0 and TEM size (nm) $\leq$ 38.345 and Zeta potential (mV) $\leq$ -9.325                                                               | rule | 2.6014      | 0.0714  | 0.6700     |
| 4   | Concentration (mg/L) $>$ 150.0 and TEM size (nm) $\leq$ 32.04 and Zeta potential (mV) $>$ -9.325                                                                   | rule | -2.2350     | 0.0952  | 0.6561     |
| 9   | Concentration (mg/L) $\leq$ 75.0 and TEM size (nm) $\leq$ 24.155 and Zeta potential (mV) $>$ -14.585                                                               | rule | -1.7272     | 0.1488  | 0.6147     |
| 21  | Concentration (mg/L) $\leq$ 37.5 and Zeta potential (mV) $>$ -13.03                                                                                                | rule | 1.4855      | 0.1964  | 0.5902     |
| 34  | Concentration (mg/L) $>$ 150.0 and TEM size (nm) $>$ 32.04                                                                                                         | rule | 1.8115      | 0.0893  | 0.5166     |
| 25  | Concentration (mg/L) $>$ 37.5 and Zeta potential (mV) $>$ -9.325                                                                                                   | rule | 0.9328      | 0.4643  | 0.4652     |
| 27  | Concentration (mg/L) $>$ 75.0 and TEM size (nm) $\leq$ 47.84 and TEM size (nm) $>$ 24.155 and Zeta potential (mV) $\leq$ 26.17 and Zeta potential (mV) $>$ -25.835 | rule | 1.4086      | 0.1071  | 0.4357     |
| 19  | Concentration (mg/L) $>$ 37.5 and TEM size (nm) $\leq$ 47.84 and Zeta potential (mV) $\leq$ 26.17 and Zeta potential (mV) $>$ -25.835                              | rule | -0.8501     | 0.4286  | 0.4207     |
| 32  | Concentration (mg/L) $\leq$ 75.0 and TEM size (nm) $>$ 24.155 and Zeta potential (mV) $\leq$ 11.285                                                                | rule | 1.3193      | 0.1131  | 0.4178     |
| 8   | Concentration (mg/L) $\leq$ 37.5 and TEM size (nm) $>$ 28.685 and Zeta potential (mV) $>$ -9.325                                                                   | rule | -1.6738     | 0.0655  | 0.4140     |
| 14  | Zeta potential (mV) $\leq$ -9.325 and Zeta potential (mV) $>$ -25.835                                                                                              | rule | -0.7219     | 0.3036  | 0.3319     |
| 18  | Concentration (mg/L) $>$ 37.5 and TEM size (nm) $\leq$ 19.155 and TEM size (nm) $>$ 13.07                                                                          | rule | 0.8465      | 0.1786  | 0.3242     |
| 7   | Concentration (mg/L) $\leq$ 37.5 and TEM size (nm) $\leq$ 19.155 and TEM size (nm) $>$ 13.07                                                                       | rule | -1.3037     | 0.0595  | 0.3085     |
| 16  | Concentration (mg/L) $>$ 75.0 and TEM size (nm) $\leq$ 24.155 and Zeta potential (mV) $>$ -14.585                                                                  | rule | 0.8025      | 0.1429  | 0.2808     |
| 17  | Concentration (mg/L) $>$ 75.0 and TEM size (nm) $\leq$ 113.04                                                                                                      | rule | -0.5303     | 0.4702  | 0.2647     |
| 12  | Concentration (mg/L) $>$ 37.5 and TEM size (nm) $\leq$ 32.04 and TEM size (nm) $>$ 16.785 and Zeta potential (mV) $>$ -25.835                                      | rule | -0.6072     | 0.2143  | 0.2491     |
| 11  | Concentration (mg/L) $>$ 75.0 and TEM size (nm) $>$                                                                                                                | rule | -0.7658     | 0.1012  | 0.2310     |

|    |                                                                                                                        |      |         |        |        |
|----|------------------------------------------------------------------------------------------------------------------------|------|---------|--------|--------|
|    | 47.84 and Zeta potential (mV) > -25.835                                                                                |      |         |        |        |
| 6  | Concentration (mg/L) > 150.0 and TEM size (nm) <= 16.785 and Zeta potential (mV) > -13.64                              | rule | -1.1142 | 0.0417 | 0.2226 |
| 10 | Concentration (mg/L) <= 75.0 and Concentration (mg/L) > 37.5 and TEM size (nm) <= 113.04 and TEM size (nm) > 38.345    | rule | -0.7300 | 0.0536 | 0.1644 |
| 37 | Concentration (mg/L) <= 150.0 and TEM size (nm) <= 28.685 and TEM size (nm) > 24.155 and Zeta potential (mV) > -25.835 | rule | 0.6808  | 0.0595 | 0.1611 |
| 29 | TEM size (nm) <= 21.72 and TEM size (nm) > 19.155                                                                      | rule | 0.5940  | 0.0774 | 0.1587 |
| 28 | Concentration (mg/L) <= 150.0 and TEM size (nm) <= 32.04 and TEM size (nm) > 16.785 and Zeta potential (mV) > 26.17    | rule | 0.6206  | 0.0595 | 0.1468 |
| 40 | Concentration (mg/L) > 37.5 and TEM size (nm) > 113.04 and Zeta potential (mV) <= 26.17                                | rule | 0.5028  | 0.0476 | 0.1071 |
| 5  | Concentration (mg/L) <= 37.5 and Zeta potential (mV) <= -13.03 and Zeta potential (mV) > -25.835                       | rule | -0.5116 | 0.0417 | 0.1022 |
| 15 | Concentration (mg/L) <= 37.5 and TEM size (nm) <= 113.04                                                               | rule | 0.2161  | 0.2500 | 0.0936 |
| 26 | TEM size (nm) > 19.155 and Zeta potential (mV) <= -11.6                                                                | rule | 0.1976  | 0.2262 | 0.0827 |
| 20 | TEM size (nm) > 21.72 and Zeta potential (mV) <= 26.17                                                                 | rule | -0.1366 | 0.4762 | 0.0682 |
| 22 | Zeta potential (mV) <= 26.17 and Zeta potential (mV) > -25.835                                                         | rule | -0.1407 | 0.7798 | 0.0583 |
| 23 | TEM size (nm) <= 16.785 and Zeta potential (mV) <= 26.17 and Zeta potential (mV) > -25.835                             | rule | -0.1050 | 0.2262 | 0.0439 |
| 30 | Concentration (mg/L) <= 75.0 and TEM size (nm) > 32.04                                                                 | rule | 0.0508  | 0.2024 | 0.0204 |
| 31 | Concentration (mg/L) > 37.5 and TEM size (nm) <= 32.04 and TEM size (nm) > 16.785 and Zeta potential (mV) <= -21.52    | rule | 0.0828  | 0.0536 | 0.0186 |
| 13 | TEM size (nm) <= 32.76 and Zeta potential (mV) <= 26.17 and Zeta potential (mV) > -25.835                              | rule | -0.0362 | 0.4405 | 0.0180 |
| 38 | Zeta potential (mV) <= -25.835                                                                                         | rule | 0.0327  | 0.0774 | 0.0087 |
| 35 | TEM size (nm) <= 113.04 and Zeta potential (mV) <= -25.835                                                             | rule | 0.0296  | 0.0774 | 0.0079 |
| 33 | TEM size (nm) <= 38.345 and Zeta potential (mV) <= -25.835                                                             | rule | 0.0158  | 0.0774 | 0.0042 |
| 36 | TEM size (nm) > 19.155 and Zeta potential (mV) <= -22.95                                                               | rule | 0.0119  | 0.0774 | 0.0032 |
